1 **ppGpp is Present in and Functions to Regulate Sleep in *Drosophila***

2

3 Xihuimin Dai<sup>1,2,#</sup>, Wei Yang<sup>1,#</sup>, Xiaohui Zhang<sup>3</sup>, Enxing Zhou<sup>1</sup>, Ying Liu<sup>3</sup>, Tao Wang<sup>1</sup>,

4 Wenxia Zhang<sup>1</sup>, Xinxiang Zhang<sup>4</sup>, and Yi Rao<sup>1,5,\*</sup>

5

6 <sup>1</sup>Peking-Tsinghua Center for Life Sciences, PKU-IDG/McGovern Institute for Brain  
7 Research, Peking University School of Life Sciences, and Chinese Institute for Brain  
8 Research, Beijing, Zhongguangchun Life Sciences Park, Beijing, China.

9 <sup>2</sup>Howard Hughes Medical Institute, Department of Biology, Brandeis University,  
10 Waltham, United States.

11 <sup>3</sup>State Key Laboratory of Natural and Biomimetic Drugs, Peking University, 38  
12 Xueyuan Road, Beijing 100191, China.

13 <sup>4</sup>College of Chemistry and Molecular Engineering, Peking University, Beijing, China

14 <sup>5</sup>Capital Medical University, Beijing, China

15

16 <sup>#</sup>These authors contributed equally.

17 <sup>\*</sup>Correspondence (email: [yrao@pku.edu.cn](mailto:yrao@pku.edu.cn))

18

19 **ABSTRACT**

20 Sleep is essential for animals, and receives inputs from circadian, homeostasis,  
21 and environment, yet the mechanisms of sleep regulation remain elusive. Discovery  
22 of molecules in living systems and demonstration of their functional roles are pivotal  
23 in furthering our understanding of the molecular basis of biology. Here we report that  
24 ppGpp (guanosine-5'-diphosphate, 3'-diphosphate), a molecule that has been detected  
25 in prokaryotes for more than five decades, is present in *Drosophila*, and plays an  
26 important role in regulation of sleep and SISL (starvation induced sleep loss). ppGpp  
27 is detected in germ-free *Drosophila* and hydrolyzed by an enzyme encoded by the  
28 *mesh1* gene in *Drosophila*. Nighttime sleep and SISL were defected in *mesh1* mutant  
29 flies, and rescued by expression of wildtype Mesh1, but not the enzymatically  
30 defective mutant Mesh1E66A. Ectopic expression of RelA, the *E. coli* synthetase for  
31 ppGpp, phenocopied *mesh1* knockout mutants, whereas overexpression of Mesh1  
32 resulted in the opposite phenotypes, supporting that ppGpp is both necessary and  
33 sufficient in sleep regulation. A chemoconnectomic screen followed by genetic  
34 intersection experiments implicate the Dilp2 neurons in the *pars intercerebralis* (PI)  
35 brain region as the site of ppGpp function. Our results have thus supported that ppGpp  
36 is present in animals after long lag since its discovery in bacteria, and revealed a  
37 physiological role of ppGpp in sleep regulation for the first time.

38

## 39 INTRODUCTION

40 It was 50 years ago when guanosine-5'-diphosphate, 3'-diphosphate (guanosine  
41 tetraphosphate, ppGpp) and guanosine-5'-triphosphate, 3'-diphosphate (guanosine  
42 pentaphosphate, pppGpp) were implicated in gene regulation in *Escherichia coli* (*E.*  
43 *coli*)(Cashel and Gallant, 1969). Collectively known as (p)ppGpp, they are key  
44 players in bacterial stringent response to amino acid starvation(Dalebroux and  
45 Swanson, 2012; Field, 2018; Gourse et al., 2018; Hauryliuk et al., 2015; Liu et al.,  
46 2015; Magnusson et al., 2005; Potrykus and Cashel, 2008; Wang et al., 2007). The  
47 level of ppGpp is regulated by the RelA/SpoT Homolog (RSH) family(Haseltine and  
48 Block, 1973; Hogg et al., 2004). In bacteria, RelA is one of the RSHs(Haseltine and  
49 Block, 1973), which contains both a ppGpp synthetase domain (SYNTH) and an  
50 inactive ppGpp hydrolase domain (HD)(Hogg et al., 2004). When amino acids are  
51 depleted, uncharged tRNAs accumulate(Fangman and Neidhardt, 1964) and activate  
52 the ribosome-associated RelA(Yang and Ishiguro, 2001), which increases the  
53 production of ppGpp(Cochran and Byrne, 1974). Another typical RSH in bacteria is  
54 the ppGpp hydrolase SpoT(Laffler and Gallant, 1974), containing a weak  
55 SYNTH(Leung and Yamazaki, 1977) and an active HD(Murray and Bremer, 1996).  
56 Upon iron limitation(Vinella et al., 2005), carbon starvation(Lesley and Shapiro,  
57 2008), or glucose phosphate stress(Kessler et al., 2017), ppGpp was also  
58 increased(Potrykus and Cashel, 2008).

59 ppGpp has also been detected in plants(Boniecka et al., 2017; Ito et al., 2012;  
60 Kasai et al., 2004; Sugliani et al., 2016; Tozawa et al., 2007; van der Biezen et al.,

61 2000; Xiong et al., 2001). More than 30 members of the RSHs have been found in  
62 bacteria and plants(Atkinson et al., 2011; Field, 2018).

63 (p)ppGpp has not been detected in animals until very recently. Early detection of  
64 ppGpp in the mouse turned out to be irreproducible(Irr et al., 1974; Martini et al.,  
65 1977; Silverman and Atherly, 1977). Work in mammalian cell lines also failed to  
66 detect ppGpp before or after amino acid deprivation(Dabrowska et al., 2006; Fan et al.,  
67 1973; Givens et al., 2004; Kim et al., 2009; Mamont et al., 1972; Rapaport et al., 1975;  
68 Sato et al., 2015; Smulson, 1970; Thammana et al., 1976; Thompson et al., 1973;  
69 Yamada et al., 2003). In *Drosophila*, metazoan SpoT homolog-1 (Mesh1), a member  
70 of the RSH family containing only the hydrolase domain for ppGpp has been  
71 found(Sun et al., 2010). And during the submission of this work, ppGpp has just been  
72 reported to be detected in *Drosophila* and human cells, and plays an important role in  
73 metabolism (Ito et al., 2020).

74 *Drosophila* has been served as a model for genetic studies of sleep for more than  
75 two decades(Hendricks et al., 2000; Shaw and Brody, 2000). Fly sleep is regulated by  
76 multiple genes functioning in several brain regions such as the fan-shape bodies  
77 (FSBs), the ellipsoid body (EB), the mushroom bodies (MB), and the *pars*  
78 *intercerebralis* (PI) (Artiushin and Sehgal, 2017; Shafer and Keene, 2021). Beside the  
79 internal control from circadian and homeostasis, sleep is also regulated by  
80 environmental factors such as food. Starvation has been found to induce sleep loss in  
81 both flies and mammals(Danguir and Nicolaidis, 1979; Keene et al., 2010).

82 We have carried out a genetic screen for genes involved in sleep regulation(Dai et

83 al., 2021; Dai et al., 2019) and here report that ppGpp is present in flies and regulates  
84 both daily sleep and starvation induced sleep loss. *mesh1*, the gene encoding ppGpp  
85 hydrolase, is expressed in a specific population of neurons, and the effects of RelA,  
86 the bacterial ppGpp synthetase, and Mesh1 overexpression could be detected when  
87 they were expressed in neurons, but not in non-neuronal cells. Further dissection  
88 narrowed down the functional significance of *mesh1*-expressing neurons in the PI.  
89 Thus, after more than 50 years of its discovery, we have confirmed the presence of  
90 ppGpp in animals and first found that it functions in sleep regulation in specific  
91 neurons.

92

## 93 **RESULTS**

### 94 **ppGpp is present and regulated by *mesh1* in *Drosophila***

95 We screened through 1765 P-element insertion lines of *Drosophila* (Eddison et al.,  
96 2012) for mutations affecting sleep latency (Fig. 1A), and found that an insertion in  
97 the *mesh1* gene (*mesh1-ins*) (Fig. 1C) resulted in significantly longer sleep latency  
98 (Figs. 1A and D) and less total sleep duration (Fig. 1B).

99 *mesh1* encodes an RSH family member in animals, and Mesh1 protein is  
100 predicted to have hydrolase activity, converting ppGpp to GDP (Sun et al., 2010) (Fig.  
101 1E). However, ppGpp has not been detected in animals until very recently (Ito et al.,  
102 2020), and the function of Mesh1 remains largely unknown..

103 Through expression, purification, and an *in vitro* hydrolysis assay of *Drosophila*  
104 Mesh1 protein in *E. coli*, we found that ppGpp was indeed degraded by Mesh1 *in*

105 *vitro* (Fig. S1A). To test the existence of endogenous ppGpp in *Drosophila*, extracts  
106 from more than 2000 flies were made. ppGpp was detected by ultra-performance  
107 liquid chromatography and mass spectrometry (UPLC-MS) in wild type (wt) flies  
108 (Figs. 2A and B). We generated a knockout (KO) line of *mesh1* (*MIKO*) using  
109 CRISPR-Cas9 to replace most of its coding sequence following the start codon with  
110 2A-attP (Fig. 1C), and found that more ppGpp was present in *MIKO* flies than the wt  
111 flies (Fig. 2C), consistent with the fact that *Drosophila mesh1* encodes only a  
112 hydrolase domain (Fig. S1B). Thus, the ppGpp detected by us was regulated by the  
113 *Drosophila mesh1* gene.

114 To tell whether the detected ppGpp was synthesized by the flies or from bacteria  
115 attached to the flies, we generated germ-free lines of wt and *MIKO* for analysis. We  
116 confirmed that the flies were indeed germ-free flies with both bacterial culture (Fig.  
117 S1C) and 16S rDNA PCR (Fig. S1D). Because ppGpp is known to be involved in  
118 starvation response in bacteria (Potrykus and Cashel, 2008; Ronneau and Hallez,  
119 2019), and *mesh1* mutant flies have been reported to have impaired starvation  
120 resistance (Sun et al., 2010), we tested ppGpp in fed and starved flies. ppGpp was  
121 detected in both fed and starved germ-free flies, and levels in *MIKO* were  
122 significantly higher in both conditions (Figs. 2D-G), suggesting that flies can indeed  
123 synthesize ppGpp.

124 Taken together, our results indicate that ppGpp is present in *Drosophila* and is  
125 regulated by *mesh1* gene.

126

127

## 128 **Decreased sleep at early night and late night in *mesh1* mutants**

129       Because we identified *mesh1* mutant through a sleep screen, we then looked at  
130 the sleep profiles of *MIKO* mutant flies. *MIKO* flies sleep significantly less than wt  
131 flies, and showed shifted activity peaks (Fig. 3A). In the paradigm of 12 hours light  
132 and 12 hours darkness (LD), *MIKO* flies showed significantly decreased nighttime  
133 sleep (Fig. 3B), decreased total sleep (Fig. 3D) and increased sleep latency at night  
134 (Fig. 3E), but no significant change in daytime sleep level (Fig. 3C) or daytime sleep  
135 latency (Fig. 3F) was detected. Sleep bout number and length were not significantly  
136 different between wt and *MIKO* flies (Fig. S2).

137       We assessed awakening according to a procedure reported recently (Tabuchi et al.,  
138 2018). Awakening number at the beginning of nighttime sleep (early night) (Fig. 3G)  
139 and awakening number near the end of nighttime sleep (late night) (Fig. 3H) were  
140 significantly increased in *MIKO* mutants.

141       Taken together, these results showed that it takes longer for *MIKO* flies to fall  
142 sleep at early night, and they wake up earlier in the late night, indicating a role of  
143 *mesh1* in regulating sleep latency at early night and awakening at late night.

144

## 145 **The enzymatic activity of *mesh1* is essential to sleep**

146       Next, we asked whether the enzymatic activity of *mesh1*, which hydrolyzes  
147 ppGpp, is important to sleep. A previous *in vitro* study has shown that an E66A  
148 mutation in Mesh1 protein significantly disrupts the ppGpp hydrolase activity (Sun et

149 al., 2010). Consistent with the previous study, we found that when expressed in  
150 bacteria, Mesh1E66A could not hydrolyze ppGpp (Fig. S1A).

151 To enable manipulation of *mesh1*-expressing cells, we generated a KO-Gal4 line  
152 of *mesh1* (*MIKOGal4*) by replacing its CDS after the start codon with an in-frame  
153 fusion of the 2A peptide and the yeast transcription factor Gal4 (Fig. 4A). We then  
154 expressed wildtype Mesh1 and Mesh1E66A respectively in *mesh1*-expressing cells of  
155 the mutant flies driven by *MIKOGal4*. We found that compared with *MIKO* mutant  
156 flies (Fig. S1E, column 2), the level of ppGpp in flies was rescued to control group  
157 level (Fig. S1E, column 3) by expression of wildtype Mesh1 (Fig. S1E, column 4),  
158 but could not be rescued by expression of Mesh1E66A (Fig. S1E, column 6). These  
159 results indicate that wt Mesh1 protein could, but Mesh1 E66A mutant protein could  
160 not, hydrolyze ppGpp either *in vitro* or *in vivo*.

161 We then looked at whether wildtype Mesh1 and Mesh1E66A could rescue the  
162 sleep phenotypes of longer sleep latency (Fig. 4B), increased awakening number at  
163 early night (Fig. 4C) and late night (Fig. 4D). We found that expression of wildtype  
164 Mesh1 driven by *MIKOGal4* rescued all these phenotypes (Figs. 4B-D, column 6).  
165 By contrast, expression of Mesh1E66A could not rescue the sleep phenotypes in  
166 *MIKOGal4/MIKO* flies (Figs. 4B-D, column 9).

167 Taken together, the *in vitro* results from bacterially expressed Mesh1 and  
168 Mesh1E66A proteins and the *in vivo* results from genetic rescue experiments in flies  
169 strongly support that Mesh1 functions through ppGpp to regulate sleep.

170



171 ***mesh1* is expressed in the nervous system of *Drosophila***

172 To examine the expression pattern of Mesh1, we crossed *MIKOGal4* with each  
173 of the following four UAS lines: *UAS-mCD8-GFP* for membrane labeling(Lee and  
174 Luo, 1999), *UAS-redStinger* for nuclei labeling(Barolo et al., 2004), *UAS-denmark* for  
175 dendrites labeling(Nicolai et al., 2010) and *UAS-syt::eGFP* for axon terminals  
176 labeling(Zhang et al., 2002).

177 We found that Mesh1 is expressed in neurons in the central brain and the ventral  
178 nerve cord (Figs. 5A, B). In the central brain, *mesh1*-expressing neurons were  
179 detected in the PI and the suboesophageal ganglia (SOG) (Fig. 5E). The  
180 *mesh1*-expressing neurons in the PI (Fig. 5A) with their axonal terminals in the SOG  
181 (Fig. 5D, E) were reminiscent of the insulin-producing cells (IPC) in the PI which  
182 were shown previously to regulate sleep(Crocker et al., 2010).

183

184 **Neuronal ppGpp regulates sleep**

185 Other than the role in ppGpp hydrolysis, Mesh1 has also been found to serve  
186 other functions in mammalian cells, such as NADPH phosphatase(Ding et al., 2020).  
187 To further investigate the role of ppGpp in sleep regulation, we ectopically expressed  
188 the *E. coli RelA* gene, which encodes a synthetase for ppGpp(Laffler and Gallant,  
189 1974) in different set of neurons.

190 Firstly, we confirmed that the RelA from *E. coli* used by us indeed can increase  
191 ppGpp level *in vitro* (Fig. S1A). We then expressed RelA in neurons labeled by  
192 different drivers using Gal4-UAS system to specifically increase the ppGpp level in

193 them. Because RelA and Mesh1 serve opposite functions in ppGpp metabolism, RelA  
194 expression would phenocopy *mesh1* mutant flies if mesh1 functions through ppGpp to  
195 regulate sleep. We found that when RelA was expressed in all the cells driven by  
196 *tub-Gal4* (O'Donnell et al., 1994), or in all the neurons driven by *elav-Gal4* (Robinow  
197 and White, 1991), sleep latency (Fig. 6A, columns 6 and 10) and awakening numbers  
198 at early night (Fig. 6B, columns 6 and 10) were significantly increased, phenocopying  
199 *MIKO* flies (Figs. 6A-B, column 2). By contrast, *UAS-RelA* driven by *repo-Gal4* for  
200 expression in glial cells (Halter et al., 1995) did not affect sleep (Figs. 6A-B, column  
201 8). These results indicate that ppGpp functions in neurons, but not in glial cells, to  
202 regulate sleep.

203 Furthermore, when RelA was specifically expressed in *mesh1*-expressing cells  
204 labeled by *MIKOGal4*, both sleep latency (Fig. 6A, column 4) and awakening  
205 numbers (Fig. 6B, column 4) were significantly increased, indicating that ppGpp level  
206 in *mesh1* positive neurons is sufficient to regulate sleep.

207 To test the effect of decreasing ppGpp level in different fly cells, we  
208 overexpressed *UAS-mesh1* in these drivers. Similar with RelA ectopic expression,  
209 *UAS-mesh1* overexpression driven by *tub-Gal4* in all cells or by *elav-Gal4* in neurons  
210 significantly decreased sleep latency (Fig. 7A, columns 5 and 9) and awakening  
211 numbers (Fig. 7B, columns 5 and 9), phenocopying flies with Mesh1 overexpressed in  
212 *mesh1*-expressing cells labeled by *Mesh1KOGal4* (Figs. 7A-B, columns 3). By  
213 contrast, *UAS-mesh1* overexpression driven by *repo-Gal4* in glial cells did not affect  
214 sleep latency or awakening numbers (Figs. 7A-B, column 7, Fig. 7C).

215 Taken together, data from increasing or decreasing the ppGpp level by expressing  
216 RelA or Mesh1 with different drivers indicate that ppGpp functions in neurons but not  
217 in glia to regulate sleep.

218

### 219 **ppGpp functions in Dilp2 neurons to regulate sleep**

220 Our results have shown that ppGpp functions in neurons, specifically,  
221 *mesh1*-expressing neurons, to regulate sleep (Figs. 4B-D, 6A-B, 7A-B). Next, to find  
222 where does ppGpp function to regulate sleep in flies, we made use of a Gal4 library of  
223 the chemoconnectome (CCT) previously generated by us, which include all the  
224 known neurotransmitters, modulators, neuropeptides and their receptors(Deng et al.,  
225 2019). We carried out a CCT screen by crossing each Gal4 line with *UAS-RelA*. We  
226 found that RelA expression driven by Gal4 lines of Trh, Capa-R, CCHa2-R, LkR,  
227 OA2 and CG13229 robustly affected sleep latency (Fig. S3A). It was noted that all of  
228 these lines drove expression in the PI region (Figs. S3B-G, insets), which suggests a  
229 functional significance of *mesh1* expression in the PI region(Fig. 5).

230 To further dissect the PI neurons for functional involvement in ppGpp regulation  
231 of sleep, we tested Gal4 lines known to drive expression in PI neurons: *Dh44-Gal4*  
232 (Cannell et al., 2016; Chen and Dahanukar, 2018), *Dilp2-Gal4* (Crocker et al., 2010;  
233 Semaniuk et al., 2018; Yurgel et al., 2019) and *R19G10-Gal4* (Collin et al., 2011;  
234 Ohno et al., 2017). To confirm whether *mesh1* is expressed in the PI neurons labeled  
235 by these drivers, we generated a Flp line of *mesh1* (*MIKIflp*, Fig. S4A), so that  
236 flippase will be expressed in *mesh1* cells and cut out the stop cassette flanked by FRT

237 in *UAS-FRT-stop-FRT-mCD8-GFP*. In this way, GFP is expressed in cells that are  
238 labeled by both the PI driver and *mesh1*. We found that *mesh1* is indeed expressed in  
239 the PI neurons labeled by *Dh44-Gal4*, *Dilp2-Gal4*, and *R19G10-Gal4* (Figs. S4B-D).  
240 Also, co-expression of Dilp2 and Mesh1 was found by Dilp2 immunostaining of  
241 *MIKOGal4>UAS-mCD8-GFP* brains (Fig. S4E).

242 We then investigated the function of ppGpp in these PI neurons by crossing the  
243 drivers with *UAS-RelA* to increase ppGpp level in the neurons. Sleep latency (Fig. 6C)  
244 and awakening numbers (Fig. 6D) were significantly increased by RelA expression in  
245 neurons labeled by *R19G10-Gal4* and *Dilp2-Gal4*. However, RelA expression in  
246 Dh44 neurons did not affect sleep (Figs. 6C-D, columns 6).

247 Each of these PI drivers was crossed with *UAS-Mesh1* to decrease ppGpp level  
248 in the neurons. Consistent with previous results, sleep latency (Fig. 7D) and  
249 awakening numbers (Fig. 7E) were decreased by Mesh1 expression in neurons labeled  
250 by *R19G10-Gal4* and *Dilp2-Gal4*, but not in Dh44 neurons (Fig. 7F).

251 Taken together, experiments with RelA ectopic expression and Mesh1  
252 overexpression have provided consistent results indicating that ppGpp functions in  
253 Dilp2 positive and Dh44-negative PI neurons to regulate sleep.

254

### 255 **ppGpp in Dilp2 neurons promotes starvation induced sleep loss**

256 Sleep regulation gets input from many other activities, for example, starvation has  
257 been found to induce sleep loss in both humans (MacFadyen et al., 1973) and  
258 flies (Keene et al., 2010). Insulin signaling through Dilp2 plays a critical role in the

259 interaction between diet and sleep homeostasis(Brown et al., 2020). Previous studies  
260 have suggested that ppGpp in bacteria and Mesh1 in flies is important to starvation  
261 response (Potrykus and Cashel, 2008; Ronneau and Hallez, 2019; Sun et al., 2010).  
262 Given the role of ppGpp in Dilp2 neurons in sleep regulation, we next investigated  
263 whether ppGpp regulates starvation induced sleep loss (SISL).

264 Baseline sleep in fed flies was recorded before flies were starved for 24  
265 hours(Yurgel et al., 2019). Sleep during starvation was compared to that before  
266 starvation (Fig. 8A). Nighttime SISL in *MIKO* flies was significantly more than that  
267 in wt flies, whereas daytime SISL were similar between the wt and *MIKO* flies (Figs.  
268 8A-B).

269 We next investigated whether the enzymatic activity of Mesh1 is also important  
270 for SISL. The *MIKOGal4* mutants were similar to *MIKO* flies in having exacerbated  
271 SISL (Fig. 8C, columns 1-4 and Fig. S5A-C). *UAS-mesh1* (Fig. 8C, columns 6-8 and  
272 Fig. S5D) but not *UAS-mesh1E66A* (Fig. 8C, columns 9-11, and Fig. S5E) could  
273 rescue the phenotype of SISL in *mesh1* knockout flies, indicating that the ppGpp  
274 hydrolyzing activity is required for Mesh1 involvement in SISL.

275 Ectopic expression of the bacterial ppGpp synthetase RelA in Mesh1-expressing  
276 cells caused an exacerbated SISL (Fig. 8D, columns 4-5), phenocopying *MIKO* flies.  
277 Oppositely, expression of Mesh1 in Mesh1-expressing cells resulted in an alleviated  
278 SISL (Fig. 9A, columns 3-4). Taken together, these results indicate that ppGpp level,  
279 rather than any other unexpected activities of RelA or Mesh1 were involved in the  
280 SISL phenotypes.

281 We then asked does ppGpp functions in the same set of cells to regulate both  
282 SISL and daily sleep. SISL was increased by general or neuronal expression, but not  
283 glial expression of RelA (Fig. 8D), and was decreased by general or neuronal  
284 overexpression, but not glial overexpression of Mesh1 (Figs. 9A and C), indicating  
285 that neuronal, but not glial, ppGpp regulates SISL. RelA (Fig. 8E) and Mesh1 (Figs.  
286 9B) expression in PI neurons labeled by *Dilp2-Gal4* or *R19G10 Gal4* lines resulted in  
287 a change in SISL. By contrast, Dh44-expressing neurons were not involved in ppGpp  
288 regulation of SISL because neither RelA expression nor Mesh1 overexpression in  
289 Dh44 neurons affected SISL (Figure 8E, 9B and 9D).

290 Thus, the Dilp2 neurons that required for ppGpp regulation of sleep latency and  
291 awakening are also involved in its regulation of SISL.

292

## 293 **DISCUSSION**

294 We have carried out a genetic screen of P element insertion lines which led to the  
295 discovery of a new mutation in the *Drosophila* ppGpp hydrolase Mesh1. Our  
296 chemical analysis revealed the presence of ppGpp in *Drosophila*. Our  
297 chemoconnectomic screen suggests involvement of PI neurons in ppGpp function.  
298 Further genetic intersection experiments confirm that ppGpp in specific PI neurons  
299 regulate sleep. Our findings indicate that ppGpp is present and has physiological  
300 functions in animals. It regulates sleep, including sleep latency and starvation induced  
301 sleep loss.

302

### 303 **Evidence for ppGpp Function in *Drosophila***

304 We obtained evidence for ppGpp function from four series of experiments. First, three  
305 mutations in *mesh1* caused sleep phenotypes in *Drosophila*. The first mutation is a  
306 P-element insertion (Eddison et al., 2012), whose phenotype (Figs. 1A-B) and  
307 molecular nature we have characterized as *mesh1-ins* (Fig. 1C). The second mutation  
308 is a knockout generated by us as *MIKO* (Fig. 1C). The third mutation is a knockin  
309 generated by us as *MIKOGal4* (Fig. 4A). All three lines have same phenotypes.

310 Second, we have shown that the hydrolyzing activity of Mesh1 is required to  
311 rescue the *mesh1* knockout mutant phenotype: if a point mutation was introduced to  
312 amino acid residue 66 by converting it from E to A, then it was enzymatically inactive  
313 *in vitro* (Fig. S1C) and unable to rescue the sleep and SISL phenotypes *in vivo* (Fig. 4,  
314 Fig. 8C).

315 Third, ectopic expression of RelA, a bacterial ppGpp synthetase, in *Drosophila*  
316 phenocopied *mesh1* knockout mutants (Fig. 6, Fig. 8).

317 Fourth, the phenotypes of Mesh1 overexpression are opposite to those of RelA  
318 expression (Fig. 7, Fig. 9).

319

### 320 **Sleep Regulation Role of ppGpp in Dilp2 Neurons**

321 Does ppGpp function in all cells or only in some cells? Results obtained here  
322 support that ppGpp functions in specific neurons in the PI to regulate sleep.

323 *mesh1* gene is expressed in specific neurons (Fig. 5). Because Mesh1 is a ppGpp  
324 hydrolase, its expression can show the location where ppGpp is hydrolyzed, but not

325 necessarily where it is synthesized or where it functions. When we screened Gal4  
326 lines from CCT to drive the expression of RelA, sleep phenotypes were observed in 6  
327 lines which were all expressed in the PI (Fig. S3). When Gal4 lines for PI neurons  
328 were used to drive RelA or Mesh1 expression, *Dilp2-Gal4* could indeed cause sleep  
329 and SISL phenotypes, while *DH44-Gal4* could not (Figs. 6-9). Expression of RelA or  
330 Mesh1 in glial cells did not affect sleep.

331 Because it is difficult to imagine that both synthetase and hydrolase could cause  
332 the same multiple phenotypes in the same neurons if these neurons are not where  
333 ppGpp functions, our results are most consistent with the idea that ppGpp functions in  
334 Dilp2 neurons to regulate sleep and SISL.

335

### 336 **ppGpp Synthesis in *Drosophila***

337 While we have shown that ppGpp is present in *Drosophila* and that it is hydrolyzed by  
338 Mesh1 which are expressed in specific neurons, we do not know how ppGpp is  
339 synthesized.

340 RSHs with the synthetase domain exist in both bacteria(Cochran and Byrne, 1974)  
341 and plants(van der Biezen et al., 2000), but not in animals(Atkinson et al., 2011; Sun  
342 et al., 2010). Either animals have evolved another enzyme to synthesize ppGpp, or  
343 that ppGpp in *Drosophila* is synthesized by bacteria and transported by specific  
344 mechanisms to neurons in the brain.

345 Plant RSHs are thought to result from lateral gene transfer events from  
346 bacteria(Field, 2018; Ito et al., 2017). Bioinformatic analyses and biochemical assays



347 indicate that ppGpp synthetase homologs are distributed widely in plants including:  
348 dicotyledon *A. thaliana*(van der Biezen et al., 2000), monocotyledon *O.*  
349 *sativa*(Xiong et al., 2001), green algae *C. reinhardtii*(Kasai et al., 2002), *S.*  
350 *japonica*(Yamada et al., 2003), *N. Tabacum*(Givens et al., 2004), pea  
351 plants(Takahashi et al., 2004), *P. nil*(Dabrowska et al., 2006), *C. annuum*(Kim et al.,  
352 2009), and moss *P. patens*(Sato et al., 2015). Presence of the N-terminal chloroplast  
353 transit peptide (cTP), causes most plant RSHs to be located in the  
354 chloroplasts(Boniecka et al., 2017; Chen et al., 2014; Mizusawa et al., 2008; Sato et  
355 al., 2009; Sugliani et al., 2016; Takahashi et al., 2004). It is unclear whether a ppGpp  
356 synthetase exists in *Drosophila* mitochondria.

357

### 358 **Molecular Targets of ppGpp**

359 Previous studies have suggested a role of Dilp2 and Dilp2 neurons in sleep regulation  
360 under fed and starved conditions(Brown et al., 2020; Cong et al., 2015; Crocker et al.,  
361 2010). How does ppGpp function in these neurons to regulate sleep and SISL? In  
362 bacteria, the best-known direct target of ppGpp is RNA polymerase  
363 (RNAP)(Artsimovitch et al., 2004; Barker et al., 2001; Kajitani and Ishihama, 1984;  
364 Kingston et al., 1981; Lindahl et al., 1976). ppGpp interaction with the RNA  
365 polymerase leads to blockage of transcription initiation(Artsimovitch et al., 2004) and  
366 elongation(Kingston et al., 1981). There are also other possible targets for  
367 ppGpp(Corrigan et al., 2016; Dalebroux and Swanson, 2012; Gourse et al., 2018;  
368 Maciag et al., 2010; Nomura et al., 2014; Pao and Dyess, 1981; Paul et al., 2005;

369 Sherlock et al., 2018; Zhang et al., 2019). A recent study utilizing a ppGpp-coupled  
370 bait uncovered new ppGpp target proteins in bacteria, including a large group of  
371 GTPase and metabolism-related enzymes(Wang et al., 2019). Future studies are  
372 required to identify the molecule(s) directly mediating sleep regulation of ppGpp in  
373 Dilp2 neurons in *Drosophila*.

374 **SUPPLEMENTAL INFORMATION**

375 Supplemental information includes 5 figures and 1 table.

376

377 **ACKNOWLEDGEMENTS**

378 We are grateful to Dr. U. Heberlein for sharing P-element insertion mutant library, Drs.  
379 J. Ni and G. Gao for providing us with CRISPR/Cas9 plasmids and flies, to Dr. Z.-F.  
380 Gong for sharing antibodies, to the Beijing Commission of Science and Technology  
381 and the National Natural Science Foundation of China (Project 31421003 to Y. R.) for  
382 grant support.

383

384 **AUTHOR CONTRIBUTIONS**

385 Yi Rao supervised and initiated the project. Wei Yang performed the majority of  
386 experiments and data analysis. Xiaohui Zhang carried out experiments of UPLC-MS.  
387 Xihuimin Dai, Wei Yang, and Enxing Zhou carried out experiments of sleep screen on  
388 P-element insertion mutants. Wei Yang and Enxing Zhou implemented the fly tracing  
389 program and developed software for sleep analyses. Xihuimin Dai, Wei Yang and Yi  
390 Rao wrote the manuscript.

391

392 **FUNDING**

393 Funding for this research was provided by the National Natural Science Foundation of  
394 China (Project 32061143017 to Y.R.) and the Research Unit of Medical Neurobiology,  
395 Chinese Academy of Medical Sciences (No. 2019RU003).

396

397

398 **DECLARATION OF INTERESTS**

399

400 The authors declare no competing interests.

401

402

403

## 404 **METHODS**

### 405 **Fly Stocks and Rearing Conditions**

406 All flies were reared on standard corn meal at 25°C and 60% humidity, under  
407 12hr:12hr LD cycle unless specified otherwise. Before behavioral assays, stocks were  
408 backcrossed into the background of an isogenized Canton S wt line in the lab for 7  
409 generations.

410 Lines ordered from the Bloomington Stock Center included: #458 (elav-Gal4),  
411 #7415 (repo-Gal4), #47887 (R19G10-Gal4), #51987 (Dh44-Gal4), nos-phiC31,  
412 #37516 (Dilp2-Gal4), #5137 (UAS-mCD8-GFP). P-element insertion collection was a  
413 gift from Dr. U Heberlein (Janelia Research Campus)(Moore et al., 1998), and  
414 CCT-Gal4 library was a collection previously generated in our lab (Deng et al., 2019).  
415 isoCS and w<sup>1118</sup> were wild-type and white-eye wild-type lines.

416

### 417 **Reagents and Plasmids**

418 PCR was performed with Phanta-Max Super-Fidelity DNA Polymerase (Vazyme).  
419 Genotyping PCR was performed with 2x Taq PCR StarMix with Loading Dye  
420 (GenStar). Restriction enzymes KpnI-HF, SacII, NotI-HF, XbaI, XhoI, BamHI-HF,  
421 DpnI, EcoRI-HF and XbaI were from New England BioLabs. Total RNA was  
422 extracted from flies with RNAPrep pure Tissue Kit (TIANGEN). Reverse  
423 transcription for cDNA cloning was performed with PrimeScript™ II 1<sup>st</sup> Strand cDNA  
424 Synthesis kit (Takara), Gibson assembly was performed with NEBuilder HiFi DNA

425 Assembly Master Mix. Transformation for cloning was performed with Trans-5  $\alpha$   
426 (TransGen), and transformation for expression was performed with Transetta  
427 (TransGen). BL21 (TransGen) was used as the bacterial gene template. Reverse  
428 transcription for quantitative PCR (qPCR) analyses was performed with PrimeScript  
429 RT Master Mix kit (Takara). qPCR was performed with TransStart Top Green qPCR  
430 SuperMix kit (TransGen).

431 pACU2 was a gift from Drs. Lily and YN Jan. The plasmids previously used in  
432 our lab included: pBSK, pET28a+. Templates of STOP-attP-3Px3-RFP,  
433 T2A-Gal4-3Px3-RFP, and T2A-flp-3Px3-RFP were previously generated in the  
434 lab(Deng et al., 2019).

435

### 436 **Molecular Cloning and Generation of Transgenic Flies**

437 Generation of all KO and KI lines was based on the CRISPR-Cas9 system with  
438 homologous recombination, according to previous procedures described(Ren et al.,  
439 2013). U6b vector was used for the transcription of sgRNA(Ren et al., 2013) and  
440 construction of targeting vectors were based on previous procedures in our lab(Deng  
441 et al., 2019).

442 To generate knock-out lines, a mixture of two *in vitro* transcribed U6b-sgRNA  
443 and one targeting vector was injected into *Drosophila* embryos. To generate  
444 U6b-sgRNA, two sgRNAs were selected on website (<https://www.flyrnai.org/crispr>),  
445 and designed into a pair of primers (M1KOSgRNA-1F, M1KOSgRNA-1R,  
446 M1KOSgRNA-2F and M1KOSgRNA-2R) without PAM sequence. The other pair of

447 primers (U6b-laczrv and U6b-primer1) were designed to anneal the backbone of U6b  
448 vector, so that they could generate PCR products containing two parts of U6b (shorter  
449 fragment by M1KO sgRNA-F and U6b-laczrv, longer fragment by M1KO sgRNA-R  
450 and U6b-primer1), which share overlapping sequences in both ends. U6b-sgRNA  
451 plasmid was built by Gibson-assembly of the PCR products. To generate the targeting  
452 vector, two fragments (2kbps) flanking the entire CDS of gene *Mesh1* except start  
453 codon were cloned as 5'Arm (amplified with genomic DNA with primers M1KO5F  
454 and M1KO5R) and 3' arm (amplified from genomic DNA with primers M1KO3F and  
455 M1KO3R). Vector pBSK was digested with KpnI and SacII, and the PCR products  
456 were introduced into the digested pBSK by Gibson-assembly. New restriction sites  
457 (NotI and XhoI) were introduced between the two arms for further use. To generate  
458 the targeting vector for *MIKO*, STOP-attP-3Px3-RFP was amplified with primers  
459 attP2M1KOF and attP2M1KOR, and inserted between NotI and XhoI by  
460 Gibson-assembly; and for *MIKOGal4*, T2A-Gal4-3Px3-RFP was inserted at same  
461 location. A mixture of U6b-sgRNAs and the targeting vector was injected into  
462 embryos of *nano*-Cas9 or *vasa*-Cas9(Ren et al., 2013). F1 individuals of RFP+ eyes  
463 were collected after being crossed with  $w^{1118}$  flies.

464 To generate knock-in line *MIKI<sup>flp</sup>*, similar procedures were performed. For  
465 U6b-sgRNA, primers for shorter fragment were M1KISgRNA-1F or  
466 M1KISgRNA-2F paired with U6b-laczrv, while primers for longer fragment were  
467 M1KISgRNA-1R or M1KISgRNA-2R with U6b-primer1. For the targeting vector,  
468 5'Arm was amplified with M1KI5F and M1KI5R, and 3'Arm with M1KI3F and

469 M1KI3R. The site flanked by two arms was selected near the very end of Mesh1 CDS,  
470 so that the stop codon was removed and the CDS was fused with T2A-flp-3P<sub>x3</sub>-RFP  
471 with primers flp2M1KIF and flp2M1KIR.

472 Generation of transgenic UAS lines was based on vector pACU2(Han et al.,  
473 2011). *Drosophila* cDNA was generated by reverse transcription from total RNA. By  
474 using the cDNA as template, Mesh1 CDS was amplified with primers (M1CDSF and  
475 M1CDSR), and inserted into digested pBSK (by EcoRI and KpnI). Point mutation of  
476 Mesh1E66A was generated from this plasmid with primers M1E66AF and M1E66AR.  
477 Both Mesh1 CDS and Mesh1E66A were cloned with primers M1ACU2F and  
478 M1ACU2R. RelA sequence was cloned from BL21 bacteria with primers RAACU2F  
479 and RAACU2R. All the above were inserted into digested pACU2 (EcoRI with XbaI)  
480 by Gibson assembly. pACU2 constructs were inserted into attP2 by nos-phiC31  
481 during embryo injection.

482 The sequence of primers are listed in Table S1.

483

#### 484 **Molecular Cloning and Inducible Expression in Bacteria**

485 pET28a<sup>+</sup> was used for bacterial expression of Mesh1 and RelA proteins. Mesh1 CDS  
486 and Mesh1E66A were generated with primers M1ET28F and M1ET28R. RelA was  
487 cloned from BL21 bacteria with primers RAET28F and RAET28R. They were  
488 inserted into pET28a<sup>+</sup> by Gibson assembly. Competent cells were transformed with  
489 the above constructs, and the strains were grown for inducible expression. To induce  
490 expression, a colony was inoculated into 1ml kanamycin containing Luria broth (LB)



491 medium, and incubated at 37°C for 2 hr. 800µl was transferred into a flask with 800ml  
492 kanamycin+ LB media and incubated for ~3hr at 37°C 220rpm, until OD<sub>600</sub> was 0.5 to  
493 0.6. 800µl 1M isopropyl β-D-1 thiogalactopyranoside (IPTG) was added into the flask.  
494 For RelA, the induction was at 37°C for 3hr; for Mesh1 and Mesh1E66A, it was at  
495 16°C for 16 hr. Bacteria was harvested by centrifugation followed by lysis with  
496 ultrasonication (Power: 30%, lysis 2s, wait 2s, 30 cycles) and centrifugation.  
497 Supernatants were passed through nickel columns, followed by two times of wash  
498 with 10ml binding buffer (20mM Tris-HCl pH 7.4, 0.5M NaCl, 5mM imidazole), and  
499 eluted with 5ml elution buffer (20mM Tris-HCl pH7.4, 0.5M NaCl, 500mM  
500 imidazole). Each step was monitored on 10% SDS-PAGE to check protein expression.  
501 Eluted protein was enriched in Millipore Amicon Ultra-15, and resuspended in 1ml of  
502 protein storage buffer (20mM Tris-HCl pH7.4, 150mM NaCl, 0.3% CHAPS, 1mM  
503 DTT).

504

#### 505 **Extraction and Measurement of ppGpp**

506 To extract ppGpp from *Drosophila*, 3ml formic acid was added to every 250 flies.  
507 After grinding for 15 seconds, 1ml 30% tri-chloric acetic acid was added to  
508 precipitate proteins. The above procedures were repeated to collect extracts from 2000  
509 flies. Supernatants were lyophilized overnight, and powders were resuspended with  
510 200µl water.

511 To measure the level of ppGpp, C18 column was used in UPLC-MS, according to  
512 a modified version of previous method(Ihara et al., 2015). The mobile phase included:

513 Buffer A (8mM *N,N*-dimethylhexylamine, 160 $\mu$ l acetic acid, 500ml water) and Buffer  
514 B (Acetonitrile). The UPLC program was: at 0min, A:B = 100% : 0%; at 10min, A:B  
515 = 40% : 60%, with linear increment. The m/z of ppGpp should be 601.95, and ATP  
516 (506.00) was used for normalization.

517

### 518 **Behavioral Assays**

519 To analyze baseline sleep under 12hr:12hr L:D cycles, approximately 48 flies of each  
520 genotype were loaded into glass tubes for video tracing (fps=1), which was analyzed  
521 by an in-house software as described previously(Dai et al., 2019; Deng et al., 2019;  
522 Qian et al., 2017). Continuous immobility of >5min was defined as a sleep  
523 bout(Hendricks et al., 2000; Shaw and Brody, 2000). Sleep latency at early night was  
524 defined as the time from light-off (ZT12) to the point when the 1<sup>st</sup> sleep bout  
525 appeared.

526 To analyze awakening numbers, video traced data was converted to data of  
527 simulated beam-crossing. In the simulation, the middle line for each tube was set as  
528 the virtual beam. According to a previous study(Tabuchi et al., 2018), brief  
529 awakening was defined as 1 cross per min, and the awakening number was the sum of  
530 such events in every 30 min. Awakening number of early night was the sum of brief  
531 awakenings at ZT12-15, and awakening number of late night was the sum of brief  
532 awakenings at ZT21-24.

533 To test starvation-induced sleep loss (SISL), sleep was recorded for the first 3  
534 days after flies were loaded into tubes(the 3<sup>rd</sup> day defined as baseline), and then flies

535 were quickly transferred to tubes of 1% agar at the end of the light phase of 3<sup>rd</sup> day,  
536 followed by a 24 hr recording of sleep during starvation. SISL ratio was defined as  
537 (starvation sleep-baseline sleep)/ baseline sleep.

538

### 539 **Immunohistochemistry and Imaging**

540 To prepare flies for imaging, 5 flies per genotype were dissected in  
541 phosphate-buffered saline (PBS). Dissected tissues were transferred to a tube of 400µl  
542 2% PFA, and fixed for 55 min. Tissues were washed 3 times with 400µl brain wash  
543 buffer (PBS containing 1% TritonX-100, 3% m/V NaCl), and then transferred to  
544 400µl blocking buffer (PBS containing 2% TritonX-100, 10% normal goat serum),  
545 followed by incubation at 4°C overnight. Tissues were then transferred to dilution  
546 buffer (0.25% TritonX-100, 1% NGS, 1x PBS) and added with primary antibodies.  
547 Tissues were stained at 4°C overnight, followed by 3 washes with 400µl brain wash  
548 buffer. Samples were transferred to fresh dilution buffer containing secondary  
549 antibodies (1:200 Alexa Fluor goat anti-chick 488 (Invitrogen) and 1:200 Alexa Fluor  
550 goat anti-mouse 633 (Invitrogen)), followed by 3 washes with 400µl brain wash  
551 buffer. Samples were then mounted on slides in Focus Clear (Cell Explorer Labs,  
552 FC-101), and imaged on Zeiss LSM 710 confocal microscope.

553 Chicken anti-GFP (1:1000) (Abcam Cat# 13970; RRID:AB\_300798) and mouse  
554 anti-Bruchpilot (1:40) (DSHB Cat# 2314866, nc82; RRID: AB\_2314866) were used  
555 as primary antibodies with AlexaFluor488 anti-chicken (1:500) (Life Technologies  
556 Cat# A11039; RRID:AB\_2534096) and AlexaFluor633 anti-mouse (1:500) (Life

557 Technologies Cat# A21052; RRID: AB\_141459) being used as respective secondary  
558 antibodies.

559

## 560 **CONTACT FOR REAGENT AND RESOURCE SHARING**

561 Further information and requests for resources and reagents should be directed to and  
562 will be fulfilled by the Lead Contact, Yi Rao ([yrao@pku.edu.cn](mailto:yrao@pku.edu.cn)).

563

564 Strains and plasmids are available upon request. The authors affirm that all data  
565 necessary for confirming the conclusions of the article are present within the article,  
566 figures, and tables.

567

568

## 569 **REFERENCES**

570 Artiushin, G., and Sehgal, A. (2017). The *Drosophila* circuitry of sleep-wake regulation. *Curr Opin*  
571 *Neurobiol* *44*, 243-250.

572 Artsimovitch, I., Patlan, V., Sekine, S., Vassilyeva, M.N., Hosaka, T., Ochi, K., Yokoyama, S., and  
573 Vassilyev, D.G. (2004). Structural basis for transcription regulation by alarmone ppGpp. *Cell* *117*,  
574 299-310.

575 Atkinson, G.C., Tenson, T., and Haurlyliuk, V. (2011). The RelA/SpoT homolog (RSH) superfamily:  
576 distribution and functional evolution of ppGpp synthetases and hydrolases across the tree of life. *PLoS*  
577 *One* *6*, e23479.

578 Barker, M.M., Gaal, T., and Gourse, R.L. (2001). Mechanism of regulation of transcription initiation by  
579 ppGpp. II. Models for positive control based on properties of RNAP mutants and competition for  
580 RNAP. *J Mol Biol* *305*, 689-702.

581 Barolo, S., Castro, B., and Posakony, J.W. (2004). New *Drosophila* transgenic reporters: insulated  
582 P-element vectors expressing fast-maturing RFP. *Biotechniques* *36*, 436-440, 442.

583 Boniecka, J., Prusinska, J., Dabrowska, G.B., and Goc, A. (2017). Within and beyond the stringent  
584 response-RSH and (p)ppGpp in plants. *Planta* *246*, 817-842.

585 Brown, E.B., Shah, K.D., Faville, R., Kottler, B., and Keene, A.C. (2020). *Drosophila* insulin-like  
586 peptide 2 mediates dietary regulation of sleep intensity. *PLoS Genet* *16*, e1008270.

587 Cannell, E., Dornan, A.J., Halberg, K.A., Terhzaz, S., Dow, J.A.T., and Davies, S.A. (2016). The

588 corticotropin-releasing factor-like diuretic hormone 44 (DH44) and kinin neuropeptides modulate  
589 desiccation and starvation tolerance in *Drosophila melanogaster*. *Peptides* 80, 96-107.

590 Cashel, M., and Gallant, J. (1969). Two compounds implicated in the function of the RC gene of  
591 *Escherichia coli*. *Nature* 221, 838-841.

592 Chen, J., Bang, W.Y., Lee, Y., Kim, S., Lee, K.W., Kim, S.W., Son, Y.S., Kim, D.W., Akhter, S., and  
593 Bahk, J.D. (2014). AtObgC-AtRSH1 interaction may play a vital role in stress response signal  
594 transduction in *Arabidopsis*. *Plant Physiol Biochem* 74, 176-184.

595 Chen, Y.D., and Dahanukar, A. (2018). DH44 neurons: gut-brain amino acid sensors. *Cell Res* 28,  
596 1048-1049.

597 Cochran, J.W., and Byrne, R.W. (1974). Isolation and properties of a ribosome-bound factor required  
598 for ppGpp and ppGpp synthesis in *Escherichia coli*. *J Biol Chem* 249, 353-360.

599 Collin, C., Hauser, F., Krogh-Meyer, P., Hansen, K.K., Gonzalez de Valdivia, E., Williamson, M., and  
600 Grimmelikhuijzen, C.J. (2011). Identification of the *Drosophila* and *Tribolium* receptors for the  
601 recently discovered insect RYamide neuropeptides. *Biochem Biophys Res Commun* 412, 578-583.

602 Cong, X., Wang, H., Liu, Z., He, C., An, C., and Zhao, Z. (2015). Regulation of Sleep by Insulin-like  
603 Peptide System in *Drosophila melanogaster*. *Sleep* 38, 1075-1083.

604 Corrigan, R.M., Bellows, L.E., Wood, A., and Grundling, A. (2016). ppGpp negatively impacts  
605 ribosome assembly affecting growth and antimicrobial tolerance in Gram-positive bacteria. *Proc Natl*  
606 *Acad Sci U S A* 113, E1710-1719.

607 Crocker, A., Shahidullah, M., Levitan, I.B., and Sehgal, A. (2010). Identification of a neural circuit that  
608 underlies the effects of octopamine on sleep:wake behavior. *Neuron* 65, 670-681.

609 Dabrowska, G., Prusinska, J., and Goc, A. (2006). [The stringent response--bacterial mechanism of an  
610 adaptive stress response]. *Postepy Biochem* 52, 87-93.

611 Dai, X., Zhou, E., Yang, W., Mao, R., Zhang, W., and Rao, Y. (2021). Molecular resolution of a  
612 behavioral paradox: sleep and arousal are regulated by distinct acetylcholine receptors in different  
613 neuronal types in *Drosophila*. *Sleep* 44.

614 Dai, X., Zhou, E., Yang, W., Zhang, X., Zhang, W., and Rao, Y. (2019). D-Serine made by serine  
615 racemase in *Drosophila* intestine plays a physiological role in sleep. *Nat Commun* 10, 1986.

616 Dalebroux, Z.D., and Swanson, M.S. (2012). ppGpp: magic beyond RNA polymerase. *Nat Rev*  
617 *Microbiol* 10, 203-212.

618 Danguir, J., and Nicolaidis, S. (1979). Dependence of sleep on nutrients' availability. *Physiol Behav* 22,  
619 735-740.

620 Deng, B., Li, Q., Liu, X., Cao, Y., Li, B., Qian, Y., Xu, R., Mao, R., Zhou, E., Zhang, W., *et al.* (2019).  
621 Chemoconnectomics: Mapping Chemical Transmission in *Drosophila*. *Neuron* 101, 876-893 e874.

622 Ding, C.C., Rose, J., Sun, T., Wu, J., Chen, P.H., Lin, C.C., Yang, W.H., Chen, K.Y., Lee, H., Xu, E., *et*  
623 *al.* (2020). MESH1 is a cytosolic NADPH phosphatase that regulates ferroptosis. *Nat Metab* 2,  
624 270-277.

625 Eddison, M., Belay, A.T., Sokolowski, M.B., and Heberlein, U. (2012). A genetic screen for olfactory  
626 habituation mutations in *Drosophila*: analysis of novel foraging alleles and an underlying neural circuit.  
627 *PLoS One* 7, e51684.

628 Fan, K., Fisher, K.M., and Edlin, G. (1973). Effect of amino acid and serum deprivation on the  
629 regulation of RNA synthesis in cultured Chinese hamster ovary cells. *Exp Cell Res* 82, 111-118.

630 Fangman, W.L., and Neidhardt, F.C. (1964). Protein and Ribonucleic Acid Synthesis in a Mutant of  
631 *Escherichia Coli* with an Altered Aminoacyl Ribonucleic Acid Synthetase. *J Biol Chem* 239,

632 1844-1847.

633 Field, B. (2018). Green magic: regulation of the chloroplast stress response by (p)ppGpp in plants and  
634 algae. *J Exp Bot* 69, 2797-2807.

635 Givens, R.M., Lin, M.H., Taylor, D.J., Mechold, U., Berry, J.O., and Hernandez, V.J. (2004). Inducible  
636 expression, enzymatic activity, and origin of higher plant homologues of bacterial RelA/SpoT stress  
637 proteins in *Nicotiana tabacum*. *J Biol Chem* 279, 7495-7504.

638 Gourse, R.L., Chen, A.Y., Gopalkrishnan, S., Sanchez-Vazquez, P., Myers, A., and Ross, W. (2018).  
639 Transcriptional Responses to ppGpp and DksA. *Annu Rev Microbiol* 72, 163-184.

640 Halter, D.A., Urban, J., Rickert, C., Ner, S.S., Ito, K., Travers, A.A., and Technau, G.M. (1995). The  
641 homeobox gene repo is required for the differentiation and maintenance of glia function in the  
642 embryonic nervous system of *Drosophila melanogaster*. *Development* 121, 317-332.

643 Han, C., Jan, L.Y., and Jan, Y.N. (2011). Enhancer-driven membrane markers for analysis of  
644 nonautonomous mechanisms reveal neuron-glia interactions in *Drosophila*. *Proc Natl Acad Sci U S A*  
645 108, 9673-9678.

646 Haseltine, W.A., and Block, R. (1973). Synthesis of guanosine tetra- and pentaphosphate requires the  
647 presence of a codon-specific, uncharged transfer ribonucleic acid in the acceptor site of ribosomes.  
648 *Proc Natl Acad Sci U S A* 70, 1564-1568.

649 Haurlyuk, V., Atkinson, G.C., Murakami, K.S., Tenson, T., and Gerdes, K. (2015). Recent functional  
650 insights into the role of (p)ppGpp in bacterial physiology. *Nat Rev Microbiol* 13, 298-309.

651 Hendricks, J.C., Finn, S.M., Panckeri, K.A., Chavkin, J., Williams, J.A., Sehgal, A., and Pack, A.I.  
652 (2000). Rest in *Drosophila* is a sleep-like state. *Neuron* 25, 129-138.

653 Hogg, T., Mechold, U., Malke, H., Cashel, M., and Hilgenfeld, R. (2004). Conformational antagonism  
654 between opposing active sites in a bifunctional RelA/SpoT homolog modulates (p)ppGpp metabolism  
655 during the stringent response [corrected]. *Cell* 117, 57-68.

656 Ihara, Y., Ohta, H., and Masuda, S. (2015). A highly sensitive quantification method for the  
657 accumulation of alarmone ppGpp in *Arabidopsis thaliana* using UPLC-ESI-qMS/MS. *J Plant Res* 128,  
658 511-518.

659 Irr, J.D., Kaulenas, M.S., and Unsworth, B.R. (1974). Synthesis of ppGpp by mouse embryonic  
660 ribosomes. *Cell* 3, 249-253.

661 Ito, D., Ihara, Y., Nishihara, H., and Masuda, S. (2017). Phylogenetic analysis of proteins involved in  
662 the stringent response in plant cells. *J Plant Res* 130, 625-634.

663 Ito, D., Kato, T., Maruta, T., Tamoi, M., Yoshimura, K., and Shigeoka, S. (2012). Enzymatic and  
664 molecular characterization of *Arabidopsis* ppGpp pyrophosphohydrolase, AtNUDX26. *Biosci*  
665 *Biotechnol Biochem* 76, 2236-2241.

666 Ito, D., Kawamura, H., Oikawa, A., Ihara, Y., Shibata, T., Nakamura, N., Asano, T., Kawabata, S.-I.,  
667 Suzuki, T., and Masuda, S. (2020). ppGpp functions as an alarmone in metazoa. *Communications*  
668 *Biology* 3, 671.

669 Kajitani, M., and Ishihama, A. (1984). Promoter selectivity of *Escherichia coli* RNA polymerase.  
670 Differential stringent control of the multiple promoters from ribosomal RNA and protein operons. *J*  
671 *Biol Chem* 259, 1951-1957.

672 Kasai, K., Kanno, T., Endo, Y., Wakasa, K., and Tozawa, Y. (2004). Guanosine tetra- and  
673 pentaphosphate synthase activity in chloroplasts of a higher plant: association with 70S ribosomes and  
674 inhibition by tetracycline. *Nucleic Acids Res* 32, 5732-5741.

675 Kasai, K., Usami, S., Yamada, T., Endo, Y., Ochi, K., and Tozawa, Y. (2002). A RelA-SpoT homolog

676 (Cr-RSH) identified in *Chlamydomonas reinhardtii* generates stringent factor in vivo and localizes to  
677 chloroplasts in vitro. *Nucleic Acids Res* 30, 4985-4992.

678 Keene, A.C., Duboue, E.R., McDonald, D.M., Dus, M., Suh, G.S., Waddell, S., and Blau, J. (2010).  
679 Clock and cycle limit starvation-induced sleep loss in *Drosophila*. *Curr Biol* 20, 1209-1215.

680 Kessler, J.R., Cobe, B.L., and Richards, G.R. (2017). Stringent Response Regulators Contribute to  
681 Recovery from Glucose Phosphate Stress in *Escherichia coli*. *Appl Environ Microbiol* 83.

682 Kim, H.M., Ryou, S.M., Song, W.S., Sim, S.H., Cha, C.J., Han, S.H., Ha, N.C., Kim, J.H., Bae, J.,  
683 Cunningham, P.R., *et al.* (2009). Genetic analysis of the invariant residue G791 in *Escherichia coli* 16S  
684 rRNA implicates RelA in ribosome function. *J Bacteriol* 191, 2042-2050.

685 Kingston, R.E., Nierman, W.C., and Chamberlin, M.J. (1981). A direct effect of guanosine  
686 tetraphosphate on pausing of *Escherichia coli* RNA polymerase during RNA chain elongation. *J Biol*  
687 *Chem* 256, 2787-2797.

688 Laffler, T., and Gallant, J.A. (1974). Stringent control of protein synthesis in *E. coli*. *Cell* 3, 47-49.

689 Lee, T., and Luo, L. (1999). Mosaic analysis with a repressible cell marker for studies of gene function  
690 in neuronal morphogenesis. *Neuron* 22, 451-461.

691 Lesley, J.A., and Shapiro, L. (2008). SpoT regulates DnaA stability and initiation of DNA replication in  
692 carbon-starved *Caulobacter crescentus*. *J Bacteriol* 190, 6867-6880.

693 Leung, K.L., and Yamazaki, H. (1977). Synthesis of pppGpp by ribosomes from an *Escherichia coli*  
694 spoT mutant and the metabolic relationship between pppGpp and ppGpp. *Can J Biochem* 55,  
695 1207-1212.

696 Lindahl, L., Post, L., and Nomura, M. (1976). DNA-dependent in vitro synthesis of fibosomal proteins,  
697 protein elongation factors, and RNA polymerase subunit alpha: inhibition by ppGpp. *Cell* 9, 439-448.

698 Liu, K., Bittner, A.N., and Wang, J.D. (2015). Diversity in (p)ppGpp metabolism and effectors. *Curr*  
699 *Opin Microbiol* 24, 72-79.

700 MacFadyen, U.M., Oswald, I., and Lewis, S.A. (1973). Starvation and human slow-wave sleep. *J Appl*  
701 *Physiol* 35, 391-394.

702 Maciag, M., Kochanowska, M., Lyzen, R., Wegrzyn, G., and Szalewska-Palasz, A. (2010). ppGpp  
703 inhibits the activity of *Escherichia coli* DnaG primase. *Plasmid* 63, 61-67.

704 Magnusson, L.U., Farewell, A., and Nystrom, T. (2005). ppGpp: a global regulator in *Escherichia coli*.  
705 *Trends Microbiol* 13, 236-242.

706 Mamont, P., Hershko, A., Kram, R., Schacter, L., Lust, J., and Tomkins, G.M. (1972). The pleiotypic  
707 response in mammalian cells: search for an intracellular mediator. *Biochem Biophys Res Commun* 48,  
708 1378-1384.

709 Martini, O., Irr, J., and Richter, D. (1977). Questioning of reported evidence for guanosine  
710 tetraphosphate synthesis in a ribosome system from mouse embryos. *Cell* 12, 1127-1131.

711 Mizusawa, K., Masuda, S., and Ohta, H. (2008). Expression profiling of four RelA/SpoT-like proteins,  
712 homologues of bacterial stringent factors, in *Arabidopsis thaliana*. *Planta* 228, 553-562.

713 Moore, M.S., DeZazzo, J., Luk, A.Y., Tully, T., Singh, C.M., and Heberlein, U. (1998). Ethanol  
714 Intoxication in *Drosophila*: Genetic and Pharmacological Evidence for Regulation by the cAMP  
715 Signaling Pathway. *Cell* 93, 997-1007.

716 Murray, K.D., and Bremer, H. (1996). Control of spoT-dependent ppGpp synthesis and degradation in  
717 *Escherichia coli*. *J Mol Biol* 259, 41-57.

718 Nicolai, L.J., Ramaekers, A., Raemaekers, T., Drozdzecki, A., Mauss, A.S., Yan, J., Landgraf, M.,  
719 Annaert, W., and Hassan, B.A. (2010). Genetically encoded dendritic marker sheds light on neuronal



720 connectivity in *Drosophila*. *Proc Natl Acad Sci U S A* *107*, 20553-20558.

721 Nomura, Y., Nozawa, A., and Tozawa, Y. (2014). Biochemical analyses of ppGpp effect on  
722 adenylosuccinate synthetases, key enzymes in purine biosynthesis in rice. *Biosci Biotechnol Biochem*  
723 *78*, 1022-1025.

724 O'Donnell, K.H., Chen, C.T., and Wensink, P.C. (1994). Insulating DNA directs ubiquitous  
725 transcription of the *Drosophila melanogaster* alpha 1-tubulin gene. *Mol Cell Biol* *14*, 6398-6408.

726 Ohno, H., Yoshida, M., Sato, T., Kato, J., Miyazato, M., Kojima, M., Ida, T., and Iino, Y. (2017).  
727 Luqin-like RYamide peptides regulate food-evoked responses in *C. elegans*. *Elife* *6*.

728 Pao, C.C., and Dyess, B.T. (1981). Effect of unusual guanosine nucleotides on the activities of some  
729 *Escherichia coli* cellular enzymes. *Biochim Biophys Acta* *677*, 358-362.

730 Paul, B.J., Berkmen, M.B., and Gourse, R.L. (2005). DksA potentiates direct activation of amino acid  
731 promoters by ppGpp. *Proc Natl Acad Sci U S A* *102*, 7823-7828.

732 Potrykus, K., and Cashel, M. (2008). (p)ppGpp: still magical? *Annu Rev Microbiol* *62*, 35-51.

733 Qian, Y., Cao, Y., Deng, B., Yang, G., Li, J., Xu, R., Zhang, D., Huang, J., and Rao, Y. (2017). Sleep  
734 homeostasis regulated by 5HT2b receptor in a small subset of neurons in the dorsal fan-shaped body of  
735 *drosophila*. *Elife* *6*.

736 Rapaport, E., Berkley, P.D., and Bucher, N.L. (1975). Charcoal adsorption assay for measurement of  
737 colchicine binding and tubulin content of crude tissue extracts. *Anal Biochem* *69*, 92-99.

738 Ren, X., Sun, J., Housden, B.E., Hu, Y., Roesel, C., Lin, S., Liu, L.P., Yang, Z., Mao, D., Sun, L., *et al.*  
739 (2013). Optimized gene editing technology for *Drosophila melanogaster* using germ line-specific Cas9.  
740 *Proc Natl Acad Sci U S A* *110*, 19012-19017.

741 Robinow, S., and White, K. (1991). Characterization and spatial distribution of the ELAV protein  
742 during *Drosophila melanogaster* development. *J Neurobiol* *22*, 443-461.

743 Ronneau, S., and Hallez, R. (2019). Make and break the alarmone: regulation of (p)ppGpp  
744 synthetase/hydrolase enzymes in bacteria. *FEMS Microbiol Rev* *43*, 389-400.

745 Sato, M., Takahashi, K., Ochiai, Y., Hosaka, T., Ochi, K., and Nabeta, K. (2009). Bacterial alarmone,  
746 guanosine 5'-diphosphate 3'-diphosphate (ppGpp), predominantly binds the beta' subunit of  
747 plastid-encoded plastid RNA polymerase in chloroplasts. *Chembiochem* *10*, 1227-1233.

748 Sato, M., Takahashi, T., Ochi, K., Matsuura, H., Nabeta, K., and Takahashi, K. (2015). Overexpression  
749 of RelA/SpoT homologs, PpRSH2a and PpRSH2b, induces the growth suppression of the moss  
750 *Physcomitrella patens*. *Biosci Biotechnol Biochem* *79*, 36-44.

751 Semaniuk, U.V., Gospodaryov, D.V., Feden'ko, K.M., Yurkevych, I.S., Vaiserman, A.M., Storey, K.B.,  
752 Simpson, S.J., and Lushchak, O. (2018). Insulin-Like Peptides Regulate Feeding Preference and  
753 Metabolism in *Drosophila*. *Front Physiol* *9*, 1083.

754 Shafer, O.T., and Keene, A.C. (2021). The Regulation of *Drosophila* Sleep. *Curr Biol* *31*, R38-R49.

755 Shaw, J., and Brody, S. (2000). Circadian rhythms in *Neurospora*: a new measurement, the reset zone. *J*  
756 *Biol Rhythms* *15*, 225-240.

757 Sherlock, M.E., Sudarsan, N., and Breaker, R.R. (2018). Riboswitches for the alarmone ppGpp expand  
758 the collection of RNA-based signaling systems. *Proc Natl Acad Sci U S A* *115*, 6052-6057.

759 Silverman, R.H., and Atherly, A.G. (1977). Mouse embryos fail to synthesize detectable quantities of  
760 guanosine 5'-diphosphate 3'-diphosphate. *Dev Biol* *56*, 200-205.

761 Smulson, M. (1970). Amino acid deprivation of human cells: effects on RNA synthesis, RNA  
762 polymerase, and ribonucleoside phosphorylation. *Biochim Biophys Acta* *199*, 537-540.

763 Sugliani, M., Abdelkefi, H., Ke, H., Bouveret, E., Robaglia, C., Caffarri, S., and Field, B. (2016). An



- 764 Ancient Bacterial Signaling Pathway Regulates Chloroplast Function to Influence Growth and  
765 Development in Arabidopsis. *Plant Cell* 28, 661-679.
- 766 Sun, D., Lee, G., Lee, J.H., Kim, H.Y., Rhee, H.W., Park, S.Y., Kim, K.J., Kim, Y., Kim, B.Y., Hong,  
767 J.I., *et al.* (2010). A metazoan ortholog of SpoT hydrolyzes ppGpp and functions in starvation  
768 responses. *Nat Struct Mol Biol* 17, 1188-1194.
- 769 Tabuchi, M., Monaco, J.D., Duan, G., Bell, B., Liu, S., Liu, Q., Zhang, K., and Wu, M.N. (2018).  
770 Clock-Generated Temporal Codes Determine Synaptic Plasticity to Control Sleep. *Cell* 175, 1213-1227  
771 e1218.
- 772 Takahashi, K., Kasai, K., and Ochi, K. (2004). Identification of the bacterial alarmone guanosine  
773 5'-diphosphate 3'-diphosphate (ppGpp) in plants. *Proc Natl Acad Sci U S A* 101, 4320-4324.
- 774 Thammana, P., Buerk, R.R., and Gordon, J. (1976). Absence of ppGpp production in synchronised  
775 Balb/C mouse 3T3 cells on isoleucine starvation. *FEBS Lett* 68, 187-190.
- 776 Thompson, L.H., Harkins, J.L., and Stanners, C.P. (1973). A mammalian cell mutant with a  
777 temperature-sensitive leucyl-transfer RNA synthetase. *Proc Natl Acad Sci U S A* 70, 3094-3098.
- 778 Tozawa, Y., Nozawa, A., Kanno, T., Narisawa, T., Masuda, S., Kasai, K., and Nanamiya, H. (2007).  
779 Calcium-activated (p)ppGpp synthetase in chloroplasts of land plants. *J Biol Chem* 282, 35536-35545.
- 780 van der Biezen, E.A., Sun, J., Coleman, M.J., Bibb, M.J., and Jones, J.D. (2000). Arabidopsis  
781 RelA/SpoT homologs implicate (p)ppGpp in plant signaling. *Proc Natl Acad Sci U S A* 97, 3747-3752.
- 782 Vinella, D., Albrecht, C., Cashel, M., and D'Ari, R. (2005). Iron limitation induces SpoT-dependent  
783 accumulation of ppGpp in *Escherichia coli*. *Mol Microbiol* 56, 958-970.
- 784 Wang, B., Dai, P., Ding, D., Del Rosario, A., Grant, R.A., Pentelute, B.L., and Laub, M.T. (2019).  
785 Affinity-based capture and identification of protein effectors of the growth regulator ppGpp. *Nat Chem*  
786 *Biol* 15, 141-150.
- 787 Wang, J.D., Sanders, G.M., and Grossman, A.D. (2007). Nutritional control of elongation of DNA  
788 replication by (p)ppGpp. *Cell* 128, 865-875.
- 789 Xiong, L., Lee, M.W., Qi, M., and Yang, Y. (2001). Identification of defense-related rice genes by  
790 suppression subtractive hybridization and differential screening. *Mol Plant Microbe Interact* 14,  
791 685-692.
- 792 Yamada, A., Tsutsumi, K., Tanimoto, S., and Ozeki, Y. (2003). Plant RelA/SpoT homolog confers salt  
793 tolerance in *Escherichia coli* and *Saccharomyces cerevisiae*. *Plant Cell Physiol* 44, 3-9.
- 794 Yang, X., and Ishiguro, E.E. (2001). Involvement of the N terminus of ribosomal protein L11 in  
795 regulation of the RelA protein of *Escherichia coli*. *J Bacteriol* 183, 6532-6537.
- 796 Yurgel, M.E., Kakad, P., Zandawala, M., Nassel, D.R., Godenschwege, T.A., and Keene, A.C. (2019). A  
797 single pair of leucokinin neurons are modulated by feeding state and regulate sleep-metabolism  
798 interactions. *PLoS Biol* 17, e2006409.
- 799 Zhang, Y.E., Baerentsen, R.L., Fuhrer, T., Sauer, U., Gerdes, K., and Brodersen, D.E. (2019). (p)ppGpp  
800 Regulates a Bacterial Nucleosidase by an Allosteric Two-Domain Switch. *Mol Cell* 74, 1239-1249  
801 e1234.
- 802 Zhang, Y.Q., Rodesch, C.K., and Broadie, K. (2002). Living synaptic vesicle marker:  
803 synaptotagmin-GFP. *Genesis* 34, 142-145.

804

805

806 **FIGURE LEGENDS**

807 **Figure 1. Results of a sleep latency screen.**

808 **(A-B)** Sleep latency **(A)** and total sleep duration **(B)** results of a screen of 1765  
809 P-element insertion lines. *mesh1-ins* flies had significant longer sleep latency **(A)** and  
810 less total sleep **(B)** than wt flies. y axis is sleep latency in minutes and total sleep in  
811 hours respectively, and x axis is screened P element insertion lines. Grey shadows  
812 indicate the standard error of the mean (SEM) from multiple flies of each line, and  
813 blue dots and rectangles shows the range of 3-fold of standard deviation from the  
814 value of wt.

815 **(C)** Schematic representations of *mesh1-ins* and *MIKO* genotypes. In *mesh1-ins*, the  
816 P-element was inserted into the CDS of the first exon. In *MIKO*, the entire CDS  
817 except the start codon was replaced with stop-2A-attP and 3Px3-RFP.

818 **(D)** Statistical analysis. Sleep latency was significantly longer in *mesh1-ins* flies  
819 (Student's t-test, \*\*\*\*  $P < 0.0001$ ). Error bars represent s.e.m.

820 **(E)** A diagram of ppGpp metabolism. In *E. coli*, GDP is converted to ppGpp by its  
821 synthetase RelA, whereas ppGpp is converted to GDP by the hydrolase SpoT. In *D.*  
822 *melanogaster*, only the hydrolase Mesh1 has been discovered but the synthetase is  
823 unknown.

824

825 **Figure 2. Identification and quantitative analysis of ppGpp in *Drosophila***

826 **(A-C)** UPLC-MS profiles of standard ppGpp **(A)**, extracts of wt flies**(B)**, and extracts  
827 of *MIKO* flies **(C)**. ppGpp is detected in wt flies and increased in *MIKO* flies. x axis  
828 is time (minutes), and y axis is intensity of MS signal at  $m/z = 601.95$ , which

829 corresponds to standard ppGpp (A).

830 (D-G) Statistical analyses of ppGpp level under fed (D,F) and starved (E,G)  
831 conditions in normal flies (D,E) and germ-free flies (F,G). For each group, ~2000  
832 male flies were sacrificed for UPLC-MS measurements. In all conditions, ppGpp  
833 level was significantly increased in *MIKO* flies compared with wt flies. Student's  
834 t-test was used, \*  $P < 0.05$ , \*\*\*  $P < 0.001$ . Error bars represent s.e.m.

835

### 836 **Figure 3. Sleep phenotypes of *MIKO* mutant flies**

837 (A) Profiles of sleep (top) and awakening (bottom) in *MIKO* Flies, plotted in 30mins  
838 bins. Shaded background indicates the dark phase (ZT12-24); white background  
839 indicates the light phase (ZT0-12). Early night (ZT 12-15) and late night (ZT 21-24)  
840 were denoted with green bars. (B-D) Statistical analyses of sleep duration during  
841 nighttime (B), daytime (C) and in total (D). Nighttime and total sleep were  
842 significantly reduced in *MIKO* flies. (E-F) Statistical analyses of sleep latency of  
843 nighttime (E) and daytime (F). Nighttime sleep latency was significantly increased in  
844 *MIKO* flies. (G-H) Statistical analyses of summed awakening numbers at early night  
845 (G) and late night (H). Awakening numbers of both early night and late night were  
846 significantly increased in *MIKO* flies. Student's t-test, \*\*  $P < 0.01$ , \*\*\*\*  $P < 0.0001$ .  
847 Error bars represent s.e.m.

848

### 849 **Figure 4. Significance of the hydrolysis activity of Mesh1 in sleep**

850 (A) Schematic representations of *mesh1* gene with the red bar indicating the region

851 deleted in *MIKO* and *MIKOGal4* flies respectively. *mesh1* CDS except the start  
852 codon was deleted in both *MIKO* and *MIKOGal4*, and the only difference is that a  
853 T2A-fused Gal4 (with a stop codon) were placed in *MIKOGal4*.  
854 **(B-D)** Sleep latency at night **(B)**, awakening number at early night **(C)**, and  
855 awakening number at late night **(D)** were rescued to wildtype level by expression of  
856 Mesh1 (column 6), but not Mesh1E66A (column 9). Numbers of flies used were  
857 denoted below each bar. Genotypes from left to right: **(1)** wildtype **(2)** *MIKO/+* **(3)**  
858 *MIKO/MIKO* **(4)** *MIKOGal4/MIKOGal4* **(5)** *MIKOGal4/+* **(6)** *MIKOGal4/MIKO*,  
859 *UAS-Mesh1* **(7)** *MIKO/MIKO*, *UAS-Mesh1* **(8)** *MIKOGal4/UAS-Mesh1* **(9)**  
860 *MIKOGal4/MIKO*, *UAS-Mesh1E66A* **(10)** *MIKO/MIKO*, *UAS-Mesh1E66A* **(11)**  
861 *MIKOGal4/UAS-Mesh1E66A*. Two-way ANOVA and Bonferroni post-tests was used,  
862 \*\*\*  $P < 0.001$ , \*\*\*\*  $P < 0.0001$ . Error bars represent s.e.m.

863

#### 864 **Figure 5. Expression patterns of *mesh1***

865 **(A-D)** Expression patterns of *MIKOGal4* labeled by mCD8-GFP **(A)**, red-stinger **(B)**,  
866 Denmark **(C)**, and Syt-eGFP **(D)** in the brain (left) and the VNC (right),  
867 immunostained with anti-GFP (green) and nc82 (magenta). **(E)** A diagrammatic  
868 summary of neurons labeled by *MIKOGal4*. A: anterior sections. P: posterior  
869 sections.

870

871 **Figure 6. RelA ectopic expression in Dilp2 neurons phenocopies *mesh1* mutants**  
872 **in sleep**

873 **(A-B)** Statistical analyses of sleep latency **(A)** and awakening numbers at early night  
874 **(B)** when RelA was expressed in all cells labeled by *tub-Gal4*, in neurons labeled by  
875 *elav-Gal4*, in glia labeled by *repo-Gal4*, or in *mesh1*-expressing cells labeled by  
876 *MIKOGal4*. Genotypes from left to right: **(1)** wildtype, **(2)** *MIKO/MIKO*, **(3)**  
877 *UAS-RelA/+*, **(4)** *MIKOGal4/UAS-RelA*, **(5)** *MIKOGal4/+*, **(6)**  
878 *elav-Gal4/+;;UAS-RelA/+*, **(7)** *elav-Gal4/+*, **(8)** *repo-Gal4/UAS-RelA*, **(9)**  
879 *repo-Gal4/+*, **(10)** *tub-Gal4/UAS-RelA*, **(11)** *tub-Gal4/+*.

880 **(C-D)** Statistical analyses of sleep latency **(C)** and awakening numbers at early night  
881 **(D)** with RelA expression in different subsets of PI neurons. Genotypes from left to  
882 right: **(1)** wildtype, **(2)** *MIKO/MIKO*, **(3)** *UAS-RelA/+*, **(4)** *R19G10-Gal4/UAS-RelA*,  
883 **(5)** *R19G10-Gal4/+*, **(6)** *Dh44-Gal4/UAS-RelA*, **(7)** *Dh44-Gal4/+*, **(8)** *Dilp2-Gal4/+;*  
884 *UAS-RelA/+*, **(9)** *Dilp2-Gal4/+*. Two-way ANOVA and Bonferroni post-tests was  
885 used, \*\*  $P < 0.01$ , \*\*\*  $P < 0.001$ , \*\*\*\*  $P < 0.0001$ . Error bars represent s.e.m.

886 .

887

## 888 **Figure 7. Mesh1 overexpression in subsets of neurons affected sleep**

889 **(A-B)** Statistical analyses of sleep latency **(A)** and awakening numbers at early night  
890 **(B)** when Mesh1 was overexpressed in all cells, neurons, glia or *mesh1*-expressing  
891 cells. Genotypes from left to right: **(1)** wildtype, **(2)** *UAS-Mesh1/+*, **(3)**  
892 *MIKOGal4/UAS-Mesh1*, **(4)** *MIKOGal4/+*, **(5)** *elav-Gal4/+;;UAS-Mesh1/+*, **(6)**  
893 *elav-Gal4/+*, **(7)** *repo-Gal4/UAS-Mesh1*, **(8)** *repo-Gal4/+*, **(9)** *tub-Gal4/UAS-Mesh1*,  
894 **(10)** *tub-Gal4/+*.

895 (C) Sleep profiles of lines in (A) and (B) in 30mins bins. Arrows denote sleep latency  
896 at early night. *UAS-Mesh1/+* in the top and bottom panels was the shared control,  
897 with the top panel showing that *repo-Gal4>UAS-Mesh1* did not affect sleep latency  
898 whereas the bottom panel showing that *elav-Gal4>UAS-Mesh1* shortened sleep  
899 latency.

900 (D-E) Statistical analyses of sleep latency (D) and awakening numbers at early night  
901 (E) with *Mesh1* overexpression in different subsets of PI neurons. Genotypes from  
902 left to right: (1) wildtype, (2) *UAS-Mesh1/+*, (3) *R19G10-Gal4/UAS-Mesh1*, (4)  
903 *R19G10-Gal4/+*, (5) *Dh44-Gal4/UAS-Mesh1*, (6) *Dh44-Gal4/+*, (7) *Dilp2-Gal4/+*;  
904 *UAS-Mesh1/+*, (8) *Dilp2-Gal4/+*.

905 (F) Representative sleep profiles of lines in (D) and (E). Arrows denote sleep latency  
906 at early night. Note that the *UAS-Mesh1/+* profile in the top and bottom panels was  
907 the shared control, with the top panel showing that *Dh44-Gal4>UAS-Mesh1* did not  
908 affect sleep latency whereas the bottom panel showing that *Dilp2-Gal4>UAS-Mesh1*  
909 shortened sleep latency. Two-way ANOVA and Bonferroni post-tests was used, \*\*  $P <$   
910 0.01, \*\*\*  $P < 0.001$ , \*\*\*\*  $P < 0.0001$ . Error bars represent s.e.m.

911

912 **Figure 8. *mesh1* mutants and RelA ectopic expression in Dilp2 neurons both**  
913 **exacerbated SISL**

914 (A) Sleep profiles of wt and *MIKO* flies before and after starvation. Flies were  
915 entrained for 3 days (recording at day 2 and day 3), transferred to 1% agar at the end  
916 of the 3rd day, followed by sleep recording with starvation of 24hrs.

917 **(B)** Statistical analysis of SISL in (A). Sleep loss was significantly exacerbated in  
918 *MIKO* flies at nighttime.

919 **(C)** Statistical analyses of SISL with *Mesh1* and *Mesh1E66A* rescue experiments.

920 Genotypes from left to right: **(1)** wildtype **(2)** *MIKO/+* **(3)** *MIKO/MIKO* **(4)**

921 *MIKOGal4/MIKO* **(5)** *MIKOGal4/+* **(6)** *MIKOGal4/MIKO, UAS-Mesh1* **(7)**

922 *MIKO/MIKO, UAS-Mesh1* **(8)** *MIKOGal4/UAS-Mesh1* **(9)** *MIKOGal4/MIKO,*

923 *UAS-Mesh1E66A* **(10)** *MIKO/MIKO, UAS-Mesh1E66A* **(11)**

924 *MIKOGal4/UAS-Mesh1E66A*.

925 **(D)** Statistical analyses of SISL with *RelA* expression in all cells, neurons, glia or

926 *mesh1*-expressing cells. Genotypes from left to right: **(1)** wildtype, **(2)** *MIKO/MIKO,*

927 **(3)** *UAS-RelA/+*, **(4)** *MIKOGal4/UAS-RelA*, **(5)** *MIKOGal4/+*, **(6)**

928 *elav-Gal4/+;;UAS-RelA/+*, **(7)** *elav-Gal4/+*, **(8)** *repo-Gal4/UAS-RelA*, **(9)**

929 *repo-Gal4/+*, **(10)** *tub-Gal4/UAS-RelA*, **(11)** *tub-Gal4/+*.

930 **(E)** Statistical analyses of SISL with *RelA* ectopic expression in different subsets of

931 PI neurons. Genotypes from left to right: **(1)** wildtype, **(2)** *MIKO/MIKO*, **(3)** *UAS-*

932 *RelA/+*, **(4)** *R19G10-Gal4/UAS-RelA*, **(5)** *R19G10-Gal4/+*, **(6)** *Dh44-Gal4/UAS-RelA*,

933 **(7)** *Dh44-Gal4/+*, **(8)** *Dilp2-Gal4/+; UAS-RelA/+*, **(9)** *Dilp2-Gal4/+*. Student's t-test

934 was used in (B), two-way ANOVA and Bonferroni post-tests was used in (C)-(E), \*\*

935  $P < 0.01$ , \*\*\*  $P < 0.001$ , \*\*\*\*  $P < 0.0001$ . Error bars represent s.e.m.

936

937 **Figure 9. Mesh1 overexpression in Dilp2 neurons reduced SISL**

938 **(A)** Statistical analyses of SISL with *Mesh1* overexpression in neurons or other cells.

939 Genotypes from left to right: (1) wildtype, (2) *UAS-Mesh1/+*, (3)  
940 *MIKOGal4/UAS-Mesh1*, (4) *MIKOGal4/+*, (5) *elav-Gal4/+;;UAS-Mesh1/+*, (6)  
941 *elav-Gal4/+*, (7) *repo-Gal4/UAS-Mesh1*, (8) *repo-Gal4/+*, (9) *tub-Gal4/UAS-Mesh1*,  
942 (10) *tub-Gal4/+*.

943 (B) Statistical analyses of SISL with Mesh1 overexpression in different subsets of PI  
944 neurons. Genotypes from left to right: (1) wildtype, (2) *UAS-Mesh1/+*, (3)  
945 *R19G10-Gal4/UAS-Mesh1*, (4) *R19G10-Gal4/+*, (5) *Dh44-Gal4/UAS- Mesh1*, (6)  
946 *Dh44-Gal4/+*, (7) *Dilp2-Gal4/+; UAS- Mesh1/+*, (8) *Dilp2-Gal4/+*.

947 (C) Representative sleep profiles of SISL in (A). Baseline sleep is in black, and sleep  
948 during starvation is in blue. Black arrows indicate that night SISL is comparable with  
949 wt; red arrows indicate night SISL was diminished.

950 (D) Representative sleep profiles of SISL in (B).

951 Two-way ANOVA and Bonferroni post-tests was used, \*\*  $P < 0.01$ , \*\*\*  $P < 0.001$ ,  
952 \*\*\*\*  $P < 0.0001$ . Error bars represent s.e.m.

953

#### 954 **Figure S1. ppGpp quantification and validation of germ-free flies.**

955 (A) ppGpp level *in vitro*. From left to right: (1) Standard ppGpp, a commercial sample;  
956 (2) Substrate only, the mixture of reaction buffer, GDP and ATP; (3) RelA+GDP,  
957 purified RelA was added to the substrate; (4) Mesh1+ppGpp, standard ppGpp and  
958 purified Mesh1 were added to the substrate; (5) Mesh1E66A+ppGpp, standard ppGpp  
959 and purified Mesh1E66A were added to the substrate.

960 (B) Schematic representations of the ppGpp synthetase domain (SD) and hydrolase



961 domain (HD) in RSH proteins from *E. coli*, *D. melanogaster*, and *H. sapiens*. The  
962 mammalian Hddc3 and the *Drosophila* Mesh1 proteins contain only HD, the bacterial  
963 RelA protein contains a weak HD, an active SD and a regulatory domain (RD).  
964 Bacterial SpoT contains an active HD, a weak SD and a RD.

965 **(C)** Examination of germ-free status by growing bacteria on LB plate. 6 conditions  
966 were examined by spread LB plate with: **(1)** blank: nothing; **(2)** water germ-:  
967 germ-free water; **(3)** wt germ-: extract of germ-free wt flies; **(4)** M1KO germ-: extract  
968 of germ-free *MIKO* flies; **(5)** wt germ+: extract of normal wt flies; **(6)** M1KO germ+:  
969 extract of normal *MIKO* flies. After incubation, bacteria were only found on plates of  
970 wt germ+ and M1KO germ+ among these conditions.

971 **(D)** Examination of germ-free status by 16S rDNA PCR. 5 pairs of 16S PCR primers  
972 were used, including **(1)** 16S-27F/16S-519R; **(2)** 16S-357F/16S-907R; **(3)**  
973 16S-530F/16S-1110R; **(4)** 16S-926F/16S-1492R; **(5)** 16S-1114F/16S-1525R. The  
974 upper and lower bands at ladder lane (Trans2K) on the left correspond to 500bp and  
975 250bp. PCR signals by primers 1, 3, and 5 were detected in wt germ+ and M1KO  
976 germ+, while no signals were detected in all three germ-free groups (water germ-, wt  
977 germ-, M1KO germ-).

978 **(E)** ppGpp level in flies. From left to right, the genotypes are: **(1)** *Mesh1KO/+* **(2)**  
979 *Mesh1KO/Mesh1KO* **(3)** *Mesh1KOGal4/+* **(4)** *Mesh1KOGal4/ Mesh1KO*,  
980 *UAS-Mesh1* **(5)** *Mesh1KOGal4/UAS-Mesh1* **(6)** *Mesh1KOGal4/ Mesh1KO*,  
981 *UAS-Mesh1E66A* **(7)** *Mesh1KOGal4/UAS-Mesh1E66A*

982

983

984 **Figure S2. Sleep bout number and length of *MIKO* flies**

985 Statistical analyses of sleep bout number (**A-B**) and bout length (**C-D**) in nighttime (**A**,  
986 **C**) and daytime (**B, D**). Sleep bout number and bout length of *MIKO* flies were  
987 comparable with wt flies. Student's t-test was used. Error bars represent s.e.m.

988

989 **Figure S3. A screen of RelA ectopic expression in CCT-Gal4 lines**

990 (**A**) The result of screen for sleep latency with 102 CCT-Gal4 lines driving RelA  
991 expression. Candidates above blue line showing three standard deviations away from  
992 the mean. RelA expression in cells labeled by 6 Gal4 lines were found to significantly  
993 increase sleep latency: Capa-R, CCHa2-R, LkR, OA2, CG13229 and Trh.

994 (**B-G**) mCD8-GFP expression driven by each of the CCT Gal4 lines: Capa-R (**B**),  
995 OA2 (**C**), CCHa2-R (**D**), CG13229 (**E**), LkR (**F**) and Trh (**G**), immunostained with  
996 anti-GFP (green) and nc82 (magenta). Insets: PI neurons labeled by each line.

997

998 **Figure S4. Mesh1 expression in PI neurons**

999 (**A**) Schematic representation of *MIKIflp*. 2A-flp-3Px3-RFP was fused in-frame to the  
1000 C terminus of *mesh1*.

1001 (**B-D**) Expression patterns of *MIKIflp*, *UAS-FRT-STOP-FRT-mCD8-GFP* in the brain,  
1002 immunostained with anti-GFP (green) and nc82 (magenta). Cells expressing mesh1  
1003 and the PI-Gal4 were labeled by GFP. Insets: higher magnification views of PI.

1004 (**E**) Co-expression of Dilp2 and Mesh1. *MIKOGal4>UAS-mCD8-GFP* brains were

1005 immunostained with anti-GFP (green) and anti-Dilp2 (red).

1006

1007 **Figure S5. Sleep profiles of SISL rescue experiments**

1008 Baseline sleep is shown in black, and sleep during starvation shown in blue; black

1009 arrows indicate that night SISL is not significantly changed compared to wt or

1010 parental controls; red arrows indicate that a specific genotype phenocopied M1KO in

1011 SISL. Exacerbated SISL in mesh1 mutants (**A-C**) were rescued by Mesh1 expression

1012 in mesh1 cells (**D**), but could not be rescued by Mesh1E66A expression (**E**).

1013

1014 **Table S1. A list of used primers.**

1015

1016

**A**

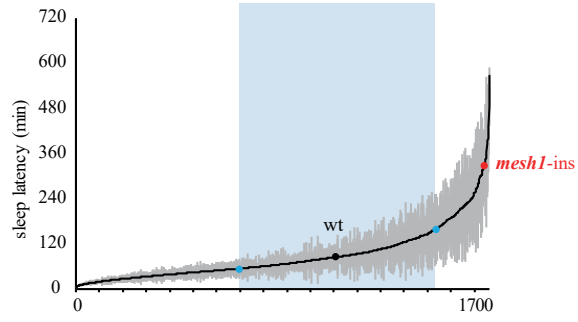

**B**

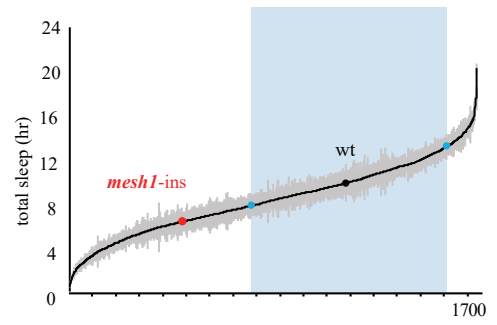

**C**

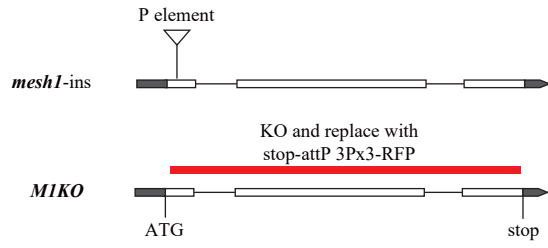

**D**

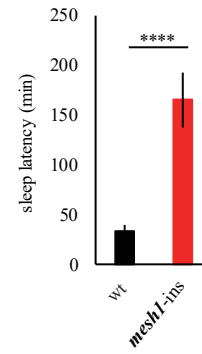

**E**

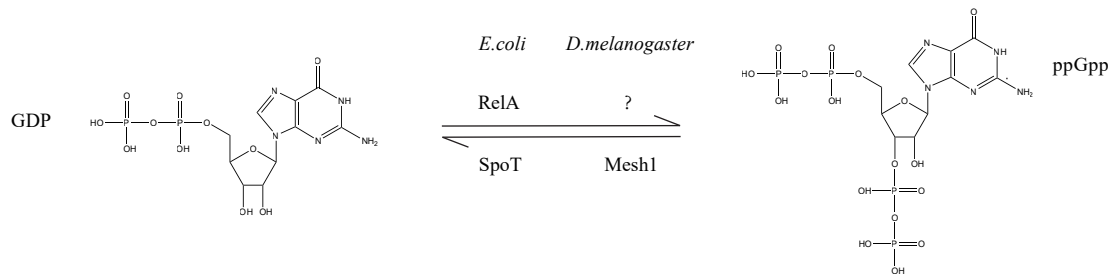

Fig. 2

**A**

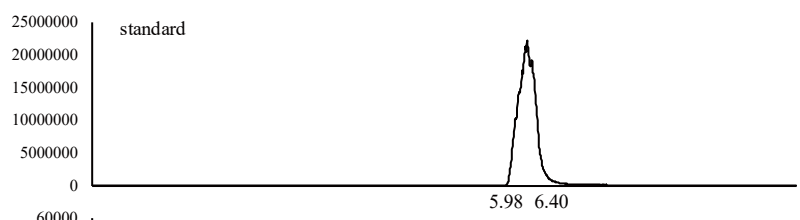

**B**

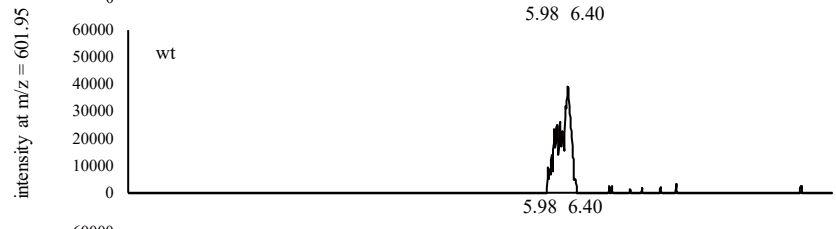

**C**

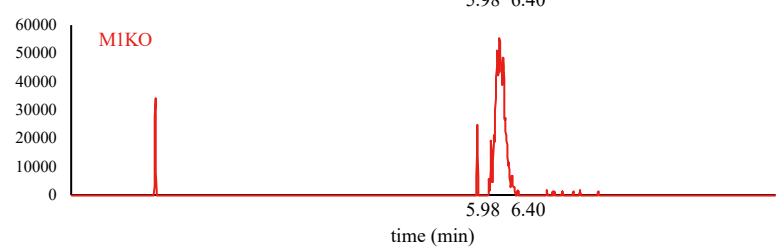

**D**

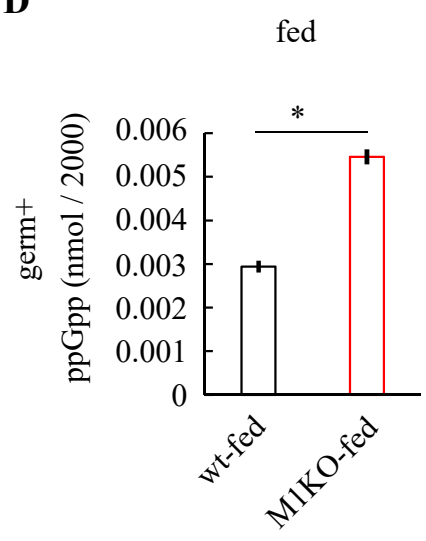

**E**

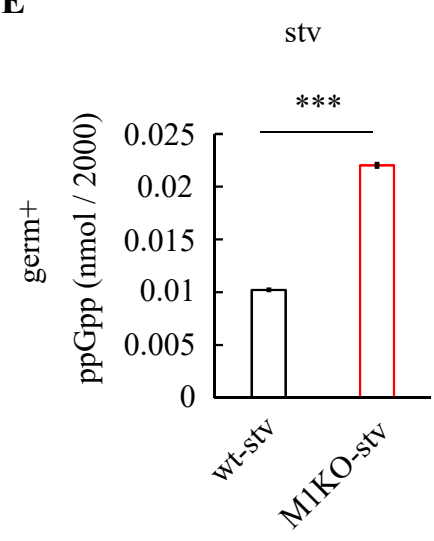

**F**

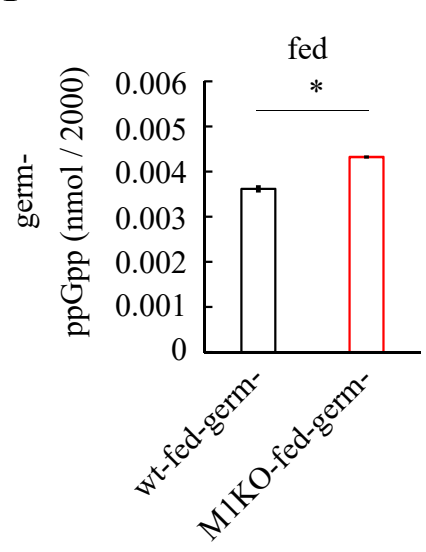

**G**

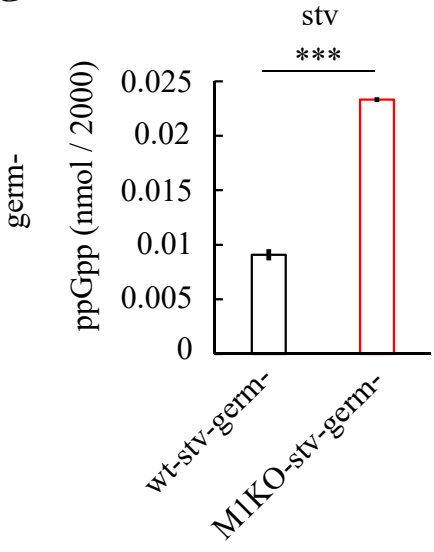

Fig. 3

**A**

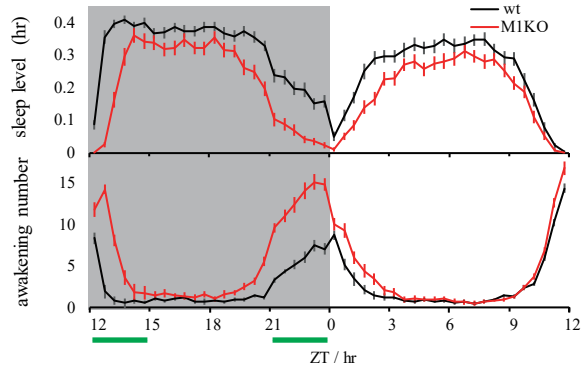

**B**

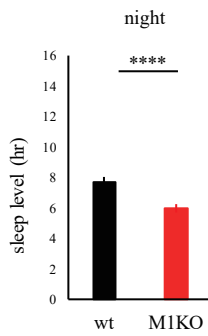

**C**

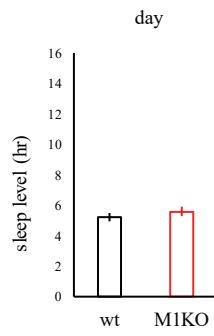

**D**

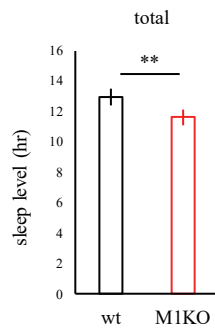

**E**

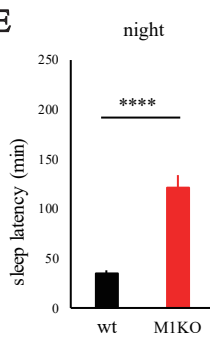

**F**

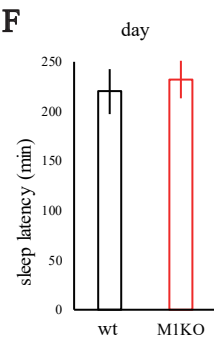

**G**

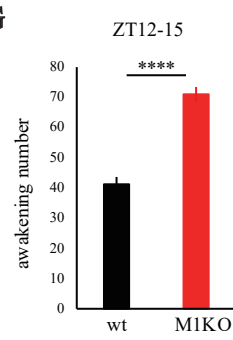

**H**

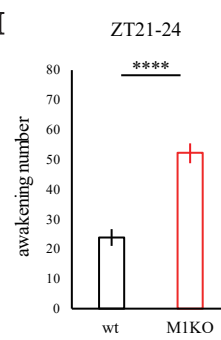

A

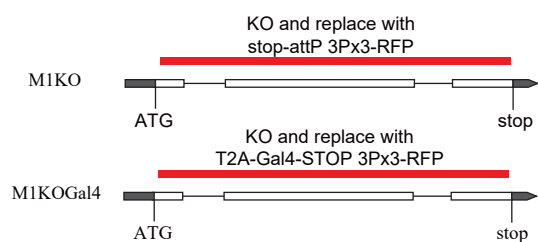

B

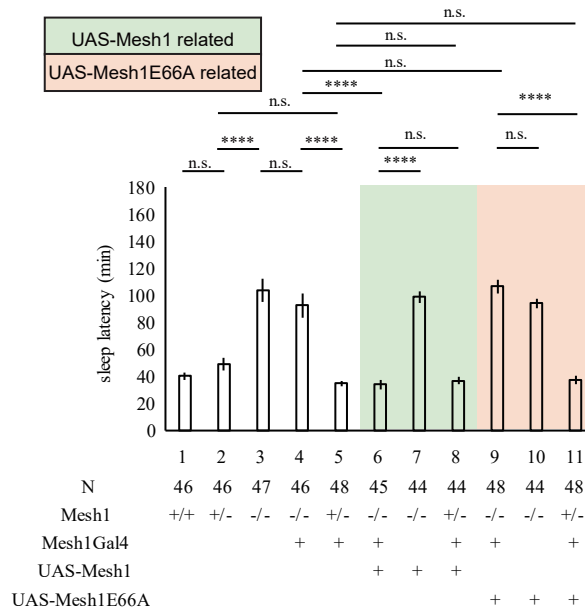

C

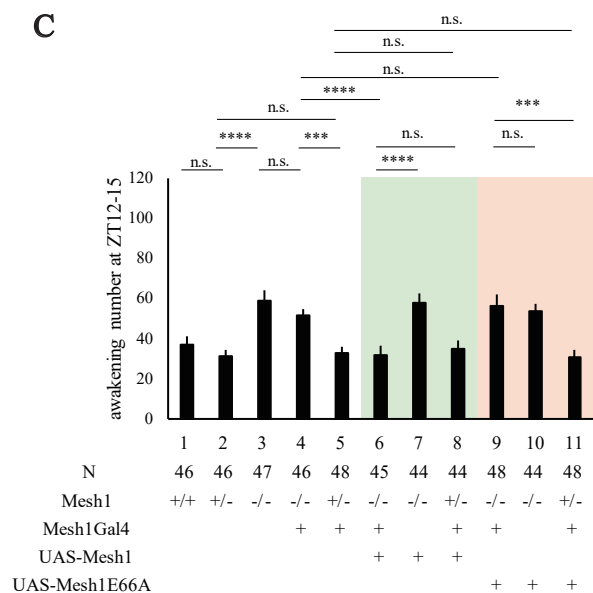

D

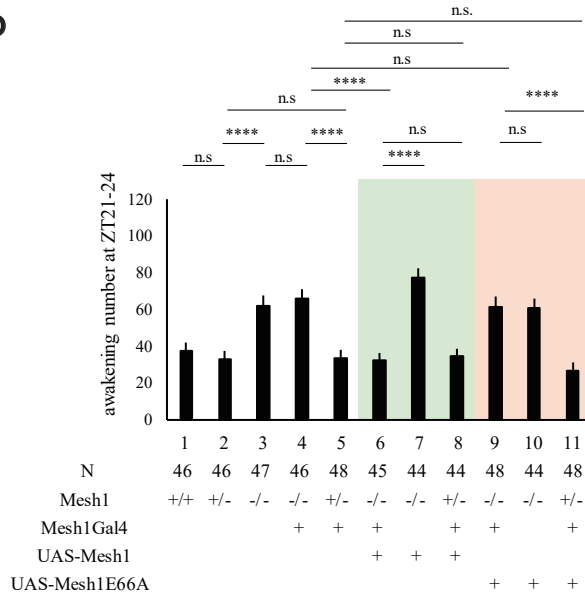

Fig. 5

MIKOGal4

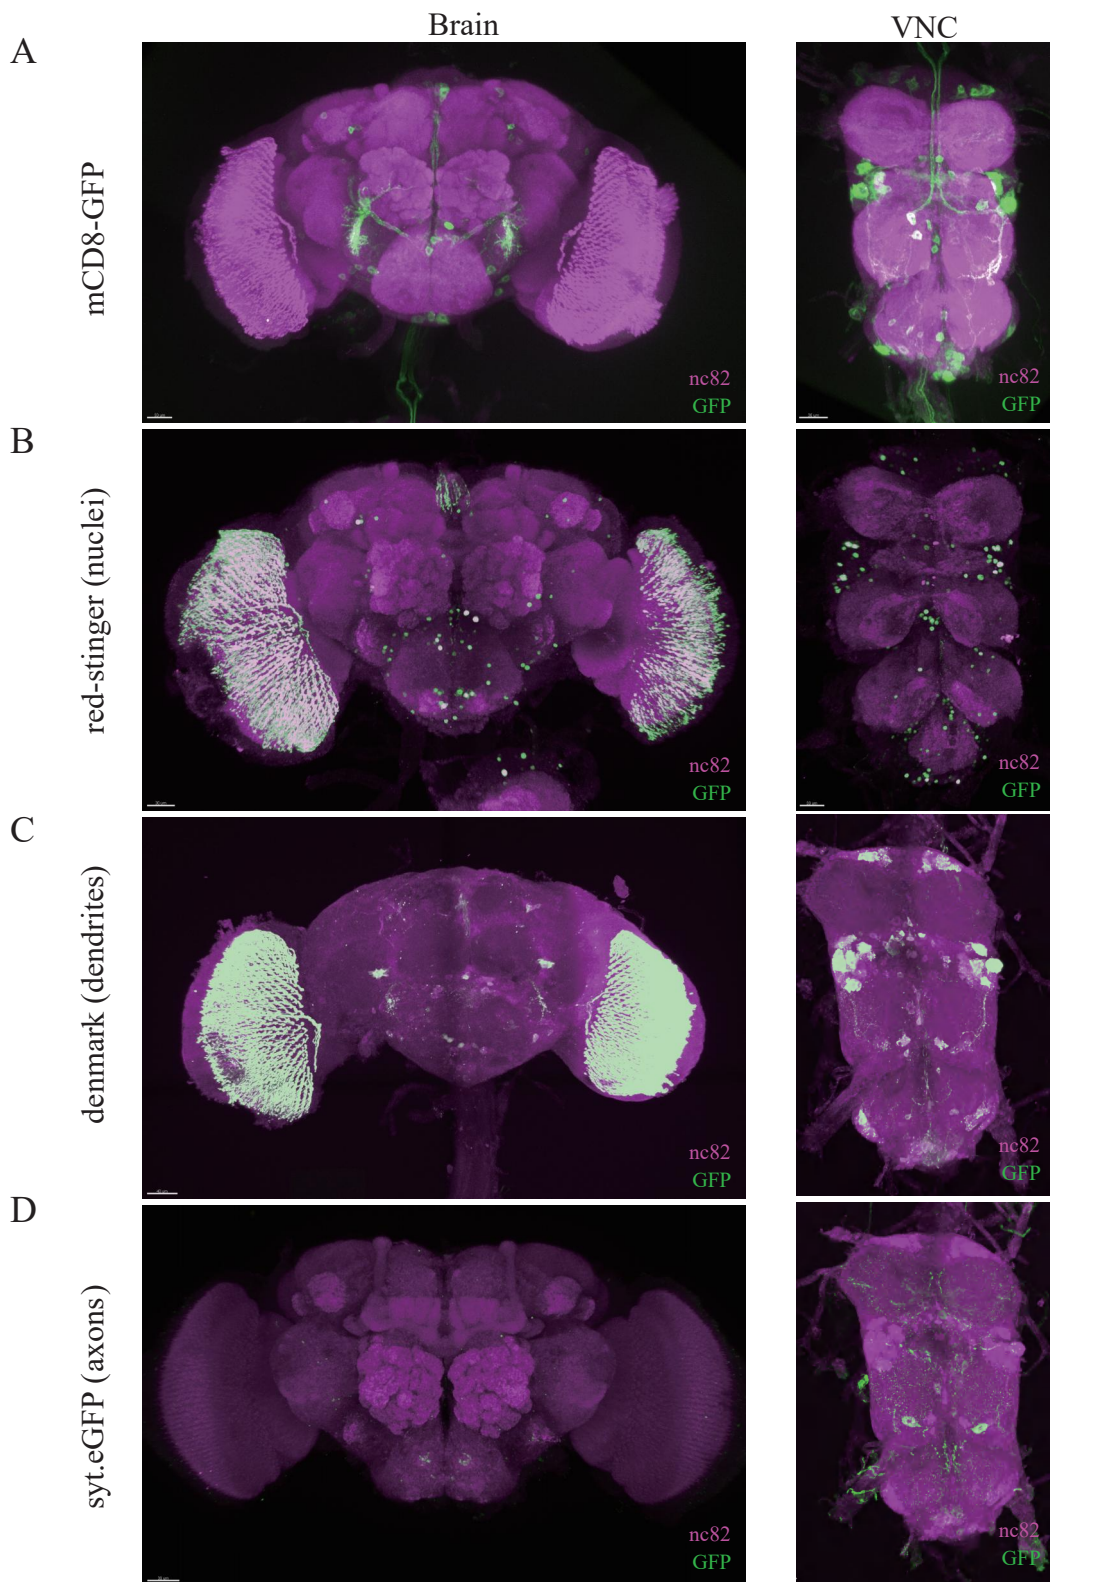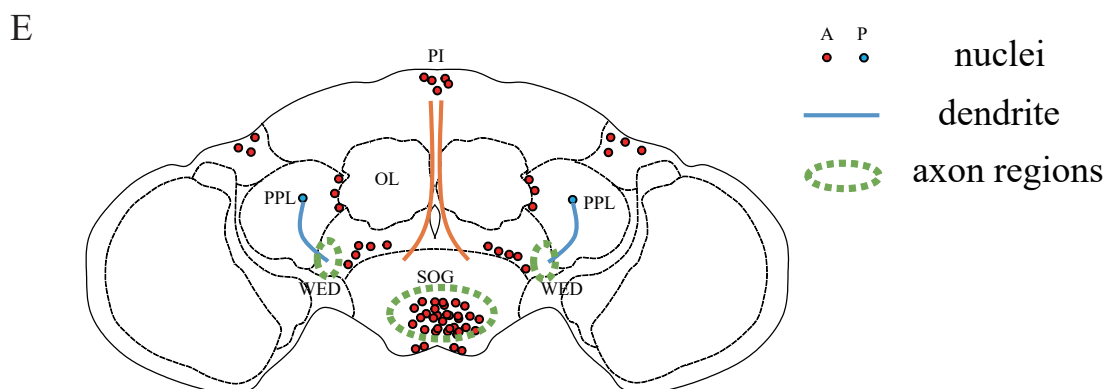



Fig. 6

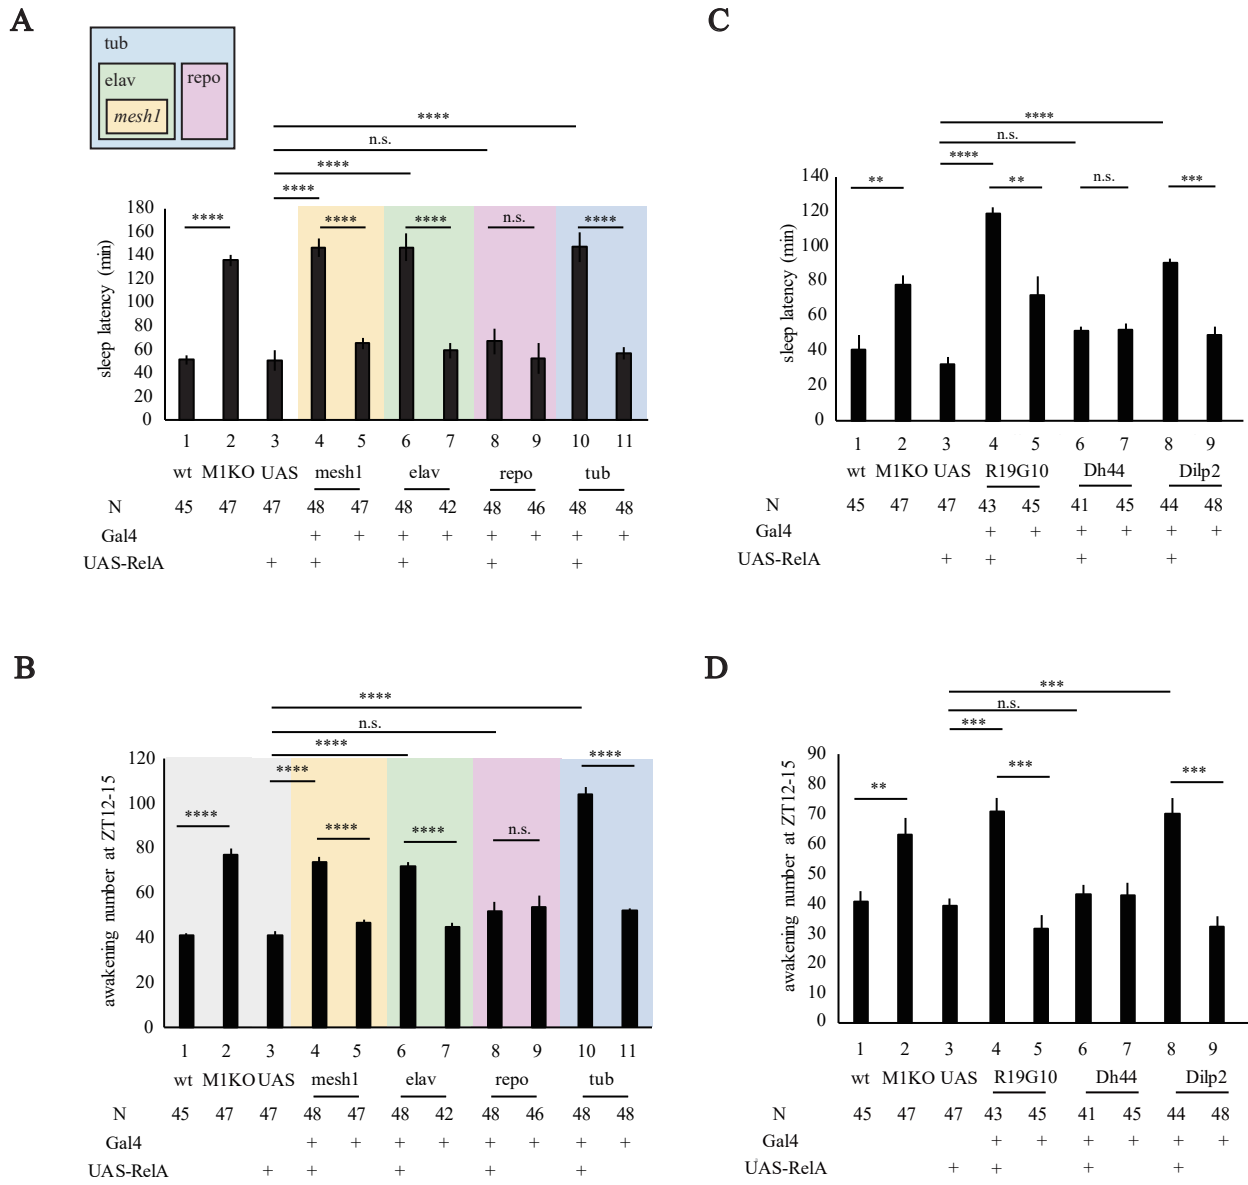

**A**

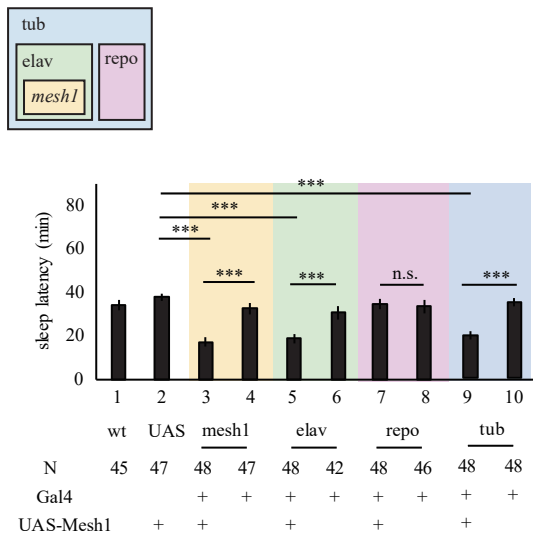

**D**

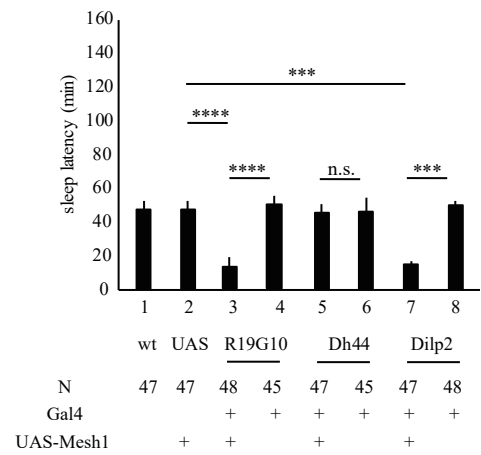

**B**

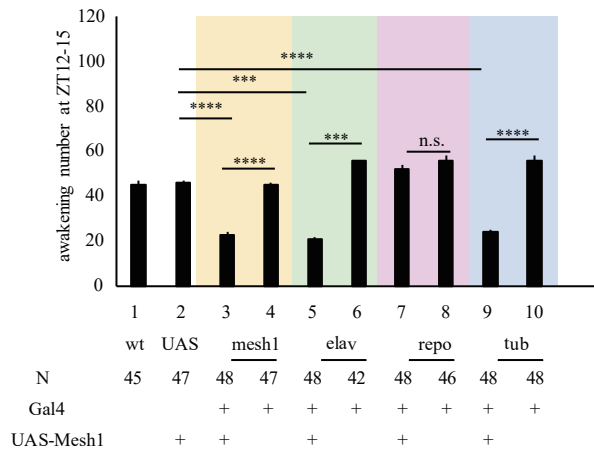

**E**

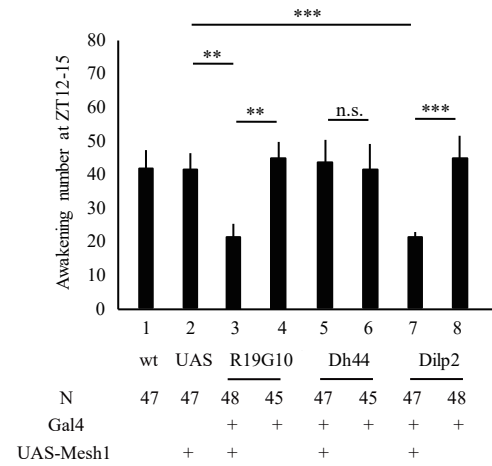

**C**

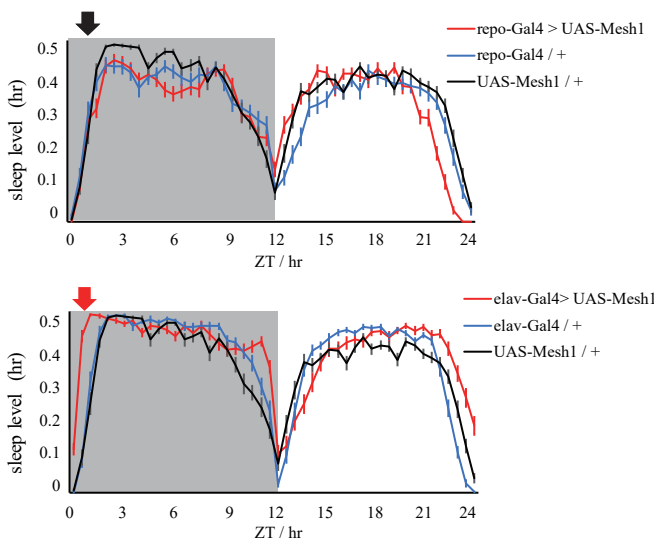

**F**

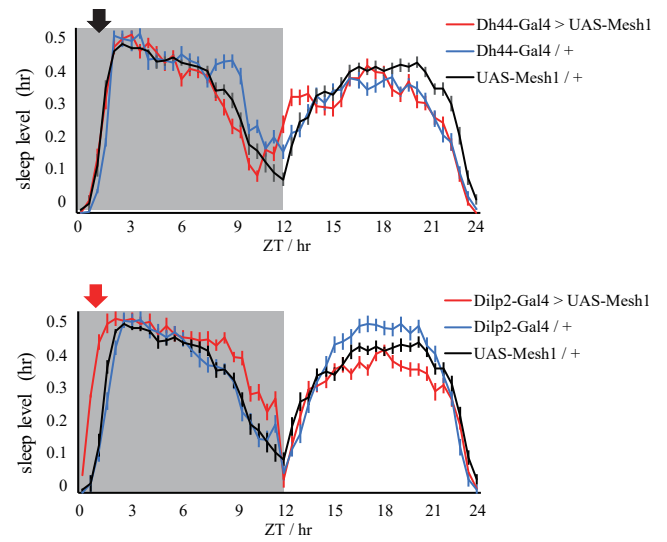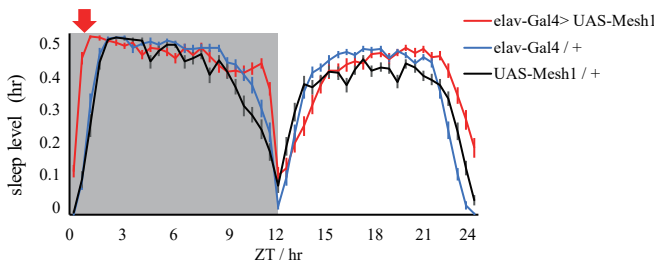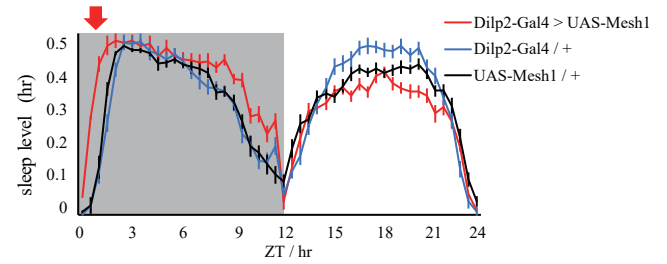

**A**

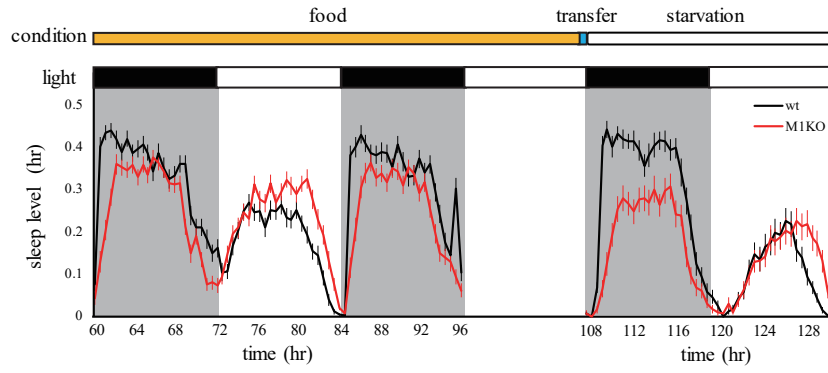

**B**

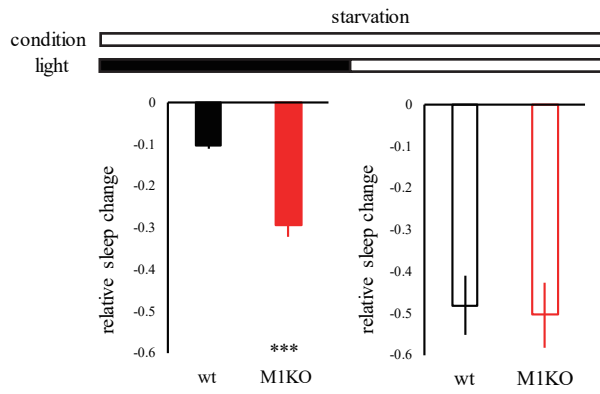

**C**

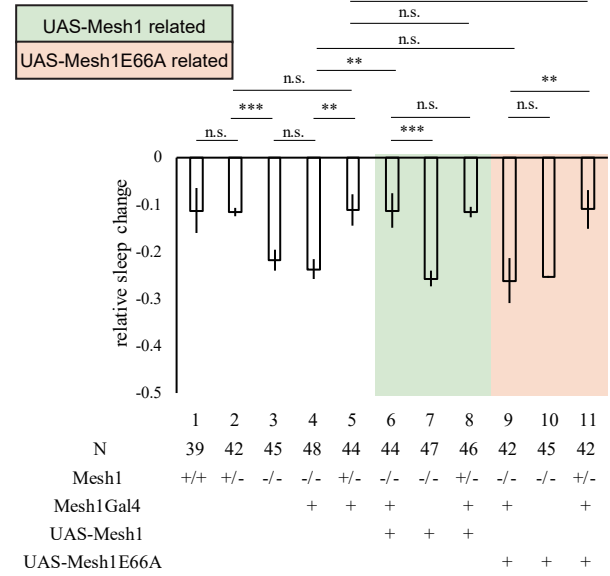

**D**

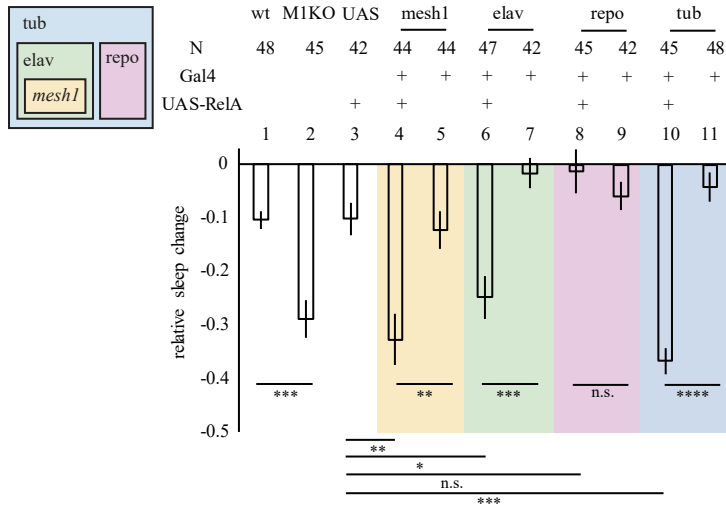

**E**

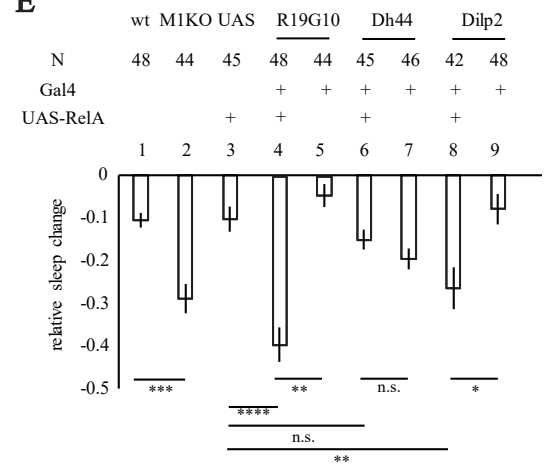

**A**

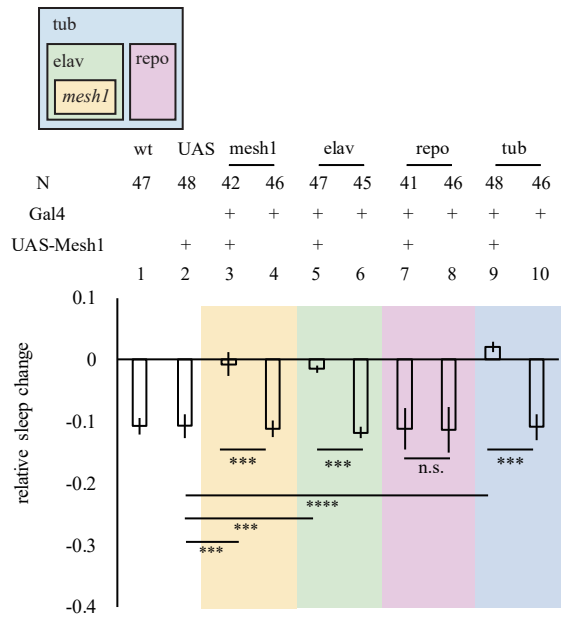

**B**

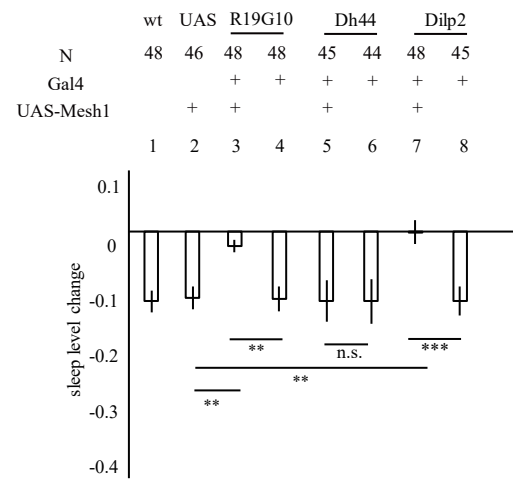

**C**

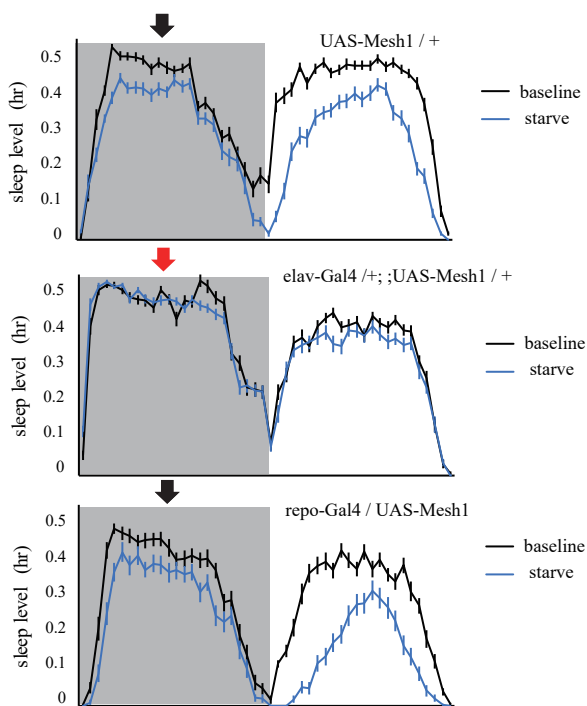

**D**

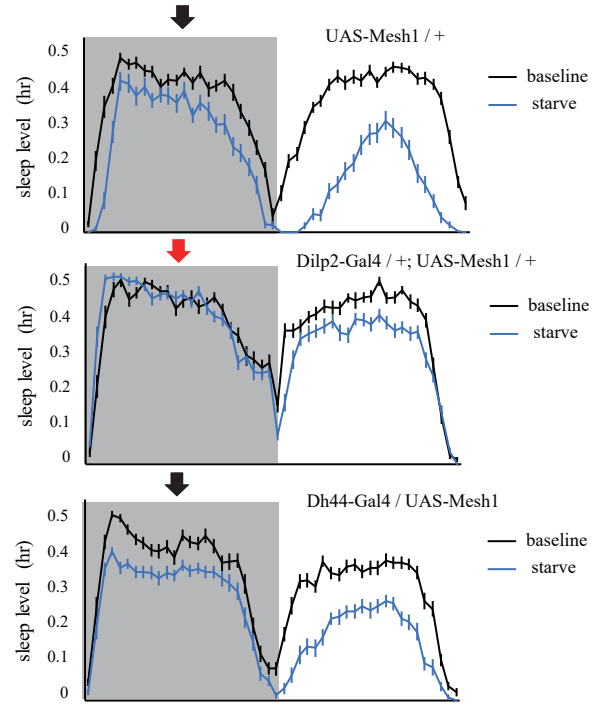

Source: https://www.biorxiv.org/content/10.1101/2022.11.17.516975v1.full.pdf
